# Supplementary material for: Predicting molecular isomerism of symmetrical and unsymmetrical N,N′-diphenyl formamidines in the solid-state: crystal structure, Hirshfeld surface analysis, pairwise interaction energy, and ΔHfusion and ΔSfusion correlations
Source: Royal Society of Chemistry journal article supplement (doi:10.1039/d1ce00458a), 2021-01-01
Supplement: d1ce00458a1.pdf [file d1ce00458a1.pdf]

---

**Supporting Information**

---

**Predicting molecular isomerism of symmetrical and unsymmetrical  $N,N'$ -diphenyl formamidines in the solid-state: crystal structure, Hirshfeld surface analysis, pairwise interaction energy,  $\Delta H_{\text{fusion}}$  and  $\Delta S_{\text{fusion}}$  correlations**

Sizwe J. Zamisa<sup>†</sup>, Unathi Bongoza<sup>†</sup>, Bernard Omondi<sup>\*,‡</sup>

<sup>†</sup>*School of Chemistry and Physics, University of KwaZulu-Natal, Westville Campus, Private Bag X54001, Durban 4000, South Africa*

<sup>‡</sup>*School of Chemistry and Physics, Pietermaritzburg Campus, University of KwaZulu-Natal, Private Bag X01, Pietermaritzburg, 3209, South Africa*

---

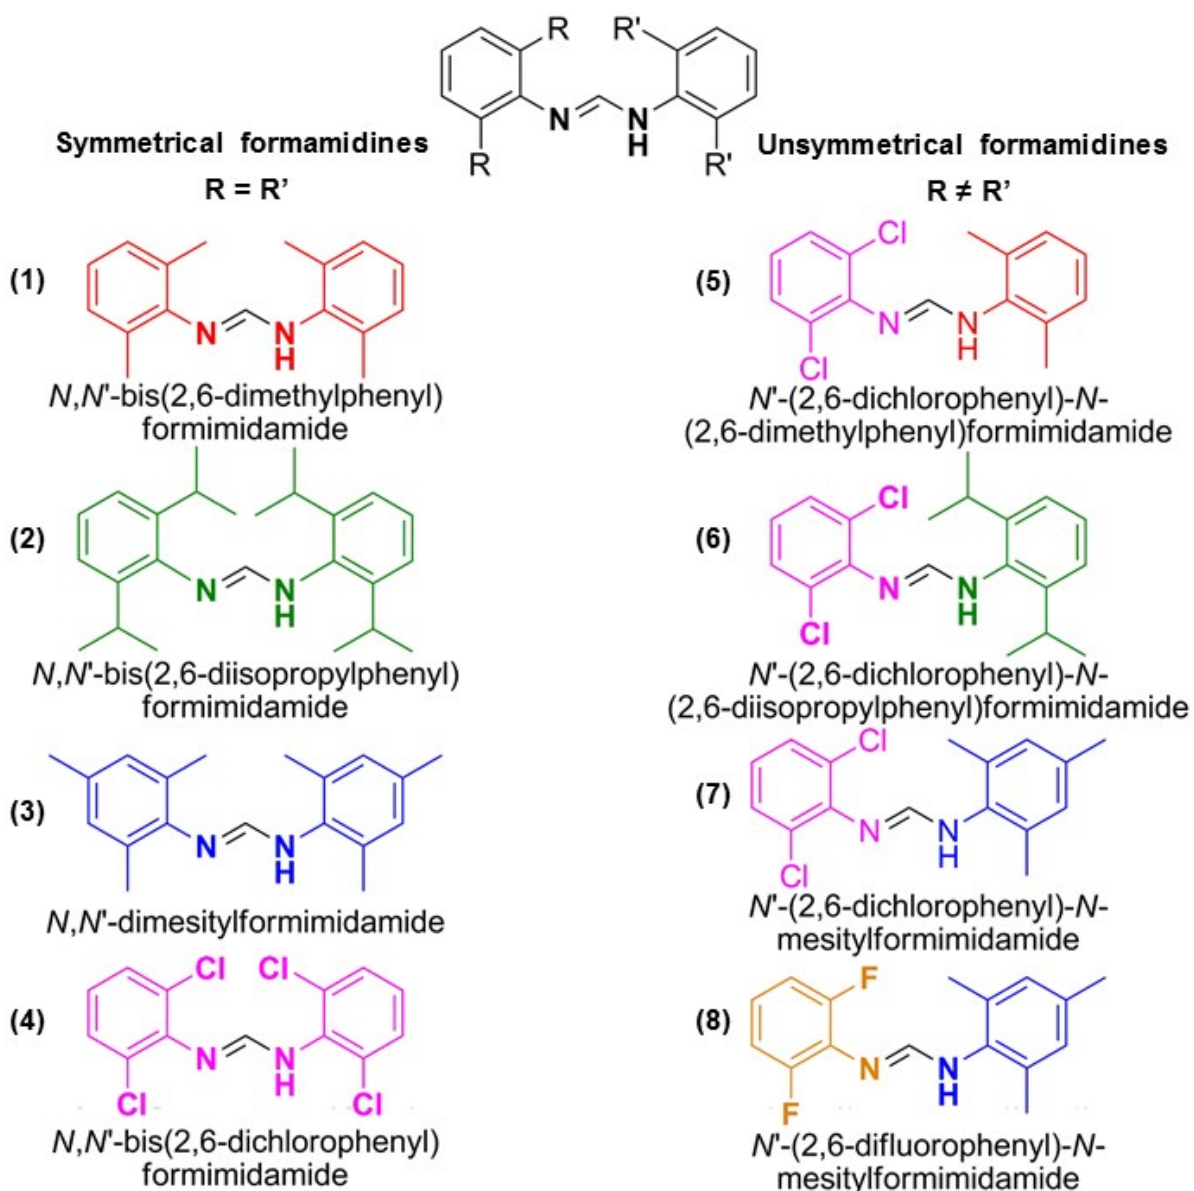

**Figure S 1:** Molecular structures of symmetrical and unsymmetrical formamidines investigated in this work

## 1. Experimental section

### 1.1. Materials and instrumentation

All solvents (ACS reagent grades,  $\geq 99.5\%$ ) were obtained from Sigma-Aldrich and used as obtained without further purification. From the same source we obtained 2,6-diisopropylaniline (97%), 2,6-dimethylaniline (99%), 2,4,6-trimethylaniline (98%), 2,6-dichloroaniline (98%), 2,6-difluoroaniline (98%) and triethylorthoformate (99%). The NMR spectra for  $^1\text{H}$  and  $^{13}\text{C}$  were measured at room temperature using a Bruker 400MHz spectrometer in  $\text{DMSO}-d_6$  and  $\text{CDCl}_3$ . Chemical shift values, reported in parts per million (ppm) relative to the solvent residual peaks in  $\text{DMSO}-d_6$  and  $\text{CDCl}_3$ , are 2.5 and 7.26 ppm, respectively, for  $^1\text{H}$  NMR and

39.5 and 77.00 ppm, respectively, for  $^{13}\text{C}$  NMR. Infra-red spectra were obtained on a PerkinElmer Universal ATR spectrum 100 FTIR spectrometer. Mass spectra of compounds were obtained from a Waters synoptic GR electrospray positive spectrometer, and the DSC curves were obtained using TGA/DCS Q600 TA Instruments. UV-visible absorption spectra were recorded with a Shimadzu UV-Vis-NIR spectrophotometer.

**1.2.** Synthetic analytical details of symmetrical  $N,N'$ -diphenylformamidines derivatives  
*N,N'*-bis(2,6-dimethylphenyl)formamidine, 1  
White solid, Yield = 89%, m.p. = 183-184 °C,  $^1\text{H}$  NMR (DMSO- $d_6$ ):  $\delta$  (ppm) = *E* + *Z* isomers: 2.07-2.31 (m, 12H, 4 x — $\text{CH}_3$ ), 6.76-7.24 [m, 6H, aromatic H], 7.45 (s, 1H, — $\text{N}=\text{C}(\mathbf{H})$ —), 8.22 [s, 1H, — $\text{N}(\mathbf{H})$ —].  $^{13}\text{C}$  NMR (DMSO- $d_6$ ):  $\delta$  (ppm) = 18.30, 18.89, 122.21, 126.46, 128.11, 128.65, 135.30, 146.63, 149.96; IR  $\nu$  ( $\text{cm}^{-1}$ ) = 3160, 3018, 2919, 2852, 2159, 1643, 1632, 1588, 1465, 1368, 1200, 1147, 1091, 759, 714, 620, 482, 449, 390; ESI-TOF MS: m/z (%): [ $\text{M} + \text{H}$ ] $^+$  253.17 (100%), [ $\text{M} + \text{K} + \text{acetonitrile}$ ] $^+$  331.18 (15%)

*N,N'*-bis(2,6-diisopropylphenyl)formamidine, 2  
White solid, Yield = 75%, m.p. = 192-195 °C,  $^1\text{H}$  NMR (DMSO- $d_6$ ):  $\delta$  (ppm) = *E* + *Z* isomers: 0.94-1.29 (m, 24H, 8 x — $\text{CH}_3$ ), 3.07-3.17 (s, 2H, methine H's) 6.90-7.36 [m, 6H, aromatic H's], 7.49 (s, 1H, — $\text{N}=\text{C}(\mathbf{H})$ —) 8.16 [s, 1H, — $\text{N}(\mathbf{H})$ —].  $^{13}\text{C}$  NMR (DMSO- $d_6$ ):  $\delta$  (ppm) = 24.23, 25.41, 27.32, 27.94, 28.42, 122.74, 123.29, 127.77, 134.13, 140.00, 146.82, 149.80; IR  $\nu$  ( $\text{cm}^{-1}$ ): 2960, 2927, 2866, 2164, 1662, 1441, 1286, 1180, 1098, 1059, 821, 799, 753, 672, 598, 536, 504, 434; ESI-TOF MS: m/z (%): [ $\text{M} + \text{H}$ ] $^+$  365.30 (100%).

*N,N'*-Bis(2,4,6-trimethylphenyl)formamidine, 3  
White solid, Yield = 64%, m.p. = 207-210 °C,  $^1\text{H}$  NMR (DMSO- $d_6$ )  $\delta$  (ppm) = *E* + *Z* isomers: 2.01-2.20 (m, 18H, 6 x — $\text{CH}_3$ ), 6.75-7.09 [m, 4H, aromatic H], 7.37 (s, 1H, — $\text{N}=\text{C}(\mathbf{H})$ —) 8.05 (s, 1H, — $\text{N}(\mathbf{H})$ —).  $^{13}\text{C}$  NMR (DMSO- $d_6$ )  $\delta$  (ppm) = 18.24, 18.79, 20.88, 127.72, 128.72, 128.91, 129.18, 135.11, 135.40; IR  $\nu$  ( $\text{cm}^{-1}$ ): 3231, 2913, 2853, 2161, 2033, 1635, 1606, 1477, 1375, 1264, 1211, 1175, 1148, 1120, 1011, 849, 775, 676, 585, 483, 409; ESI-TOF MS: m/z (%): [ $\text{M} + \text{H}$ ] $^+$  281.21 (100%)

*N,N'*-bis(2,6-dichlorophenyl)formamidine, 4  
White solid, Yield = 82%, m.p. = 211-212 °C,  $^1\text{H}$  NMR (DMSO- $d_6$ )  $\delta$  (ppm) = 6.99-7.61 (m, 6H, aromatic H's, *E* + *Z* isomers), 7.73 (s, 0.5H, — $\text{N}=\text{C}(\mathbf{H})$ — (*E*<sub>syn</sub> isomer)), 8.31 (s, 0.5H, — $\text{N}=\text{C}(\mathbf{H})$ — (*E*<sub>anti</sub> isomer)), 9.32 (s, 0.5H, — $\text{N}(\mathbf{H})$ —, (*E*<sub>syn</sub> isomer)), 10.08 (s, 0.5H, — $\text{N}(\mathbf{H})$ —,

( $E_{\text{anti}}$  isomer).  $^{13}\text{C}$  NMR (DMSO- $d_6$ )  $\delta$  (ppm) = 128.89, 129.02, 129.51, 129.67, 129.81, 132.31, 133.68, 160.101, 164.87; IR  $\nu$  ( $\text{cm}^{-1}$ ): 2844, 1654, 1566, 1553, 1441, 1432, 1302, 1220, 1190, 771, 737, 721, 618, 532, 396; ESI-TOF MS:  $m/z$  (%);  $[\text{M} + \text{Na}]^+$  356.93 (100%),  $[\text{2,6-dichloroaniline} + \text{H}_2\text{O}]^+$  179.01 (35%).

### 1.3. Synthetic analytical details of unsymmetrical $N,N'$ -diphenylformamidine derivatives

$N$ -(2,6-dichlorophenyl)- $N'$ -(2,6-dimethylphenyl)formamidine, 5

White solid, Yield = 65%, m.p. = 205-208 °C,  $^1\text{H}$  NMR (DMSO- $d_6$ )  $\delta$  (ppm) =  $E_{\text{syn}}$ : 2.351 (s, 6H, 2 x  $-\text{CH}_3$ ), 6.93 (t, 1H,  $J = 7.99$  Hz, aromatic H), 7.11 (s, 3H, aromatic H's), 7.36 (d, 2H,  $J = 8.00$  Hz, aromatic H's), 7.68 (d, 1H,  $J = 3.40$  Hz,  $-\text{N}=\text{C}(\text{H})-$ ), 8.75 (s, 1H,  $-\text{N}(\text{H})-$ ), Selected peaks for  $E_{\text{anti}}$ : 7.93 (d,  $J = 12.77$  Hz,  $-\text{N}=\text{C}(\text{H})-$ ), 9.25 (s,  $-\text{N}(\text{H})-$ ).  $^{13}\text{C}$  NMR (DMSO- $d_6$ )  $\delta$  (ppm) = 18.69, 123.56, 127.08, 127.96, 128.11, 128.68, 136.20, 136.32, 147.49, 152.29; IR  $\nu$  ( $\text{cm}^{-1}$ ): 3162, 2922, 2837, 2164, 2034, 1633, 1553, 1444, 1431, 1368, 1218, 1198, 1149, 999, 766, 737, 697, 590, 548, 500, 483, 393; ESI-TOF MS:  $m/z$  (%);  $[\text{M}]^+$  292.05 (100%).

$N'$ -(2,6-chlorophenyl)- $N$ -(2,6-diisopropylphenyl)formamidine, 6

White solid, Yield = 78%, m.p. = 212-216 °C,  $^1\text{H}$  NMR (DMSO- $d_6$ )  $\delta$  (ppm) =  $E_{\text{syn}}$ : 1.18 (d, 12H, 4 x  $-\text{CH}_3$ ), 3.36-3.45 (m, 2H, methine H's), 6.92 (t, 1H,  $J = 7.99$  Hz, aromatic H), 7.19 (d, 2H,  $J = 7.60$  Hz, aromatic H's), 7.27, (d, 1H,  $J = 7.46$  Hz, aromatic H), 7.34 (d, 2H,  $J = 8.01$  Hz, aromatic H's), 7.74 (d, 1H,  $J = 3.16$  Hz,  $-\text{N}=\text{C}(\text{H})-$ ), 8.75 (s, 1H,  $-\text{N}(\text{H})-$ ), Selected peaks for  $E_{\text{anti}}$ : 7.98 (d,  $J = 14.6$  Hz,  $-\text{N}=\text{C}(\text{H})-$ ), 9.24 (s,  $-\text{N}(\text{H})-$ ).  $^{13}\text{C}$  NMR (DMSO- $d_6$ )  $\delta$  (ppm) = 23.61, 23.98, 24.86, 27.96, 28.27, 123.36, 123.42, 123.62, 127.92, 127.97, 128.78, 133.40, 146.66, 147.65, 153.17; IR  $\nu$  ( $\text{cm}^{-1}$ ): 2964, 2868, 1588, 1576, 1491, 1448, 1432, 1307, 1215, 1195, 1151, 1055, 823, 801, 784, 770, 736, 598, 545, 459, 406; ESI-TOF MS:  $m/z$  (%);  $[\text{M} + \text{Na}]^+$  371.13 (100%),  $[\text{2,6-dichloroaniline} + \text{H}_2\text{O}]^+$  179.03 (15%).

$N$ -(2,6 dichlorophenyl)- $N'$ -(2,4,6- trimethylphenyl) formamidine, 7

White solid, Yield = 70%, m.p. = 219-221 °C,  $^1\text{H}$  NMR (DMSO- $d_6$ )  $\delta$  (ppm) =  $E_{\text{syn}}$ : 2.24-2.29 (9H, 3 x  $-\text{CH}_3$ ), 6.91 (3H, aromatic H), 7.35 (d, 2H,  $J = 7.99$  Hz, aromatic H's), 7.65 (d, 1H,  $J = 3.35$  Hz,  $-\text{N}=\text{C}(\text{H})-$ ) 8.63 (s, 1H,  $-\text{N}(\text{H})-$ ), Selected peaks for  $E_{\text{anti}}$ : 7.82 (d,  $J = 5.12$  Hz,  $-\text{N}=\text{C}(\text{H})-$ ), 9.09 (s,  $-\text{N}(\text{H})-$ );  $^{13}\text{C}$  NMR (DMSO- $d_6$ )  $\delta$  (ppm) = 18.59, 20.99, 123.47, 127.93, 128.66, 128.72, 129.20, 133.64, 135.83, 136.02, 147.57, 152.37; IR  $\nu$  ( $\text{cm}^{-1}$ ): 3199, 2971, 2920, 2855, 2731, 2159, 2038, 1637, 1606, 1553, 1445, 1368, 1218, 1176, 1068, 921,

849, 769, 745, 693, 594, 501, 409, 401, 385; ESI-TOF MS: m/z (%); [M + Na]<sup>+</sup> 329.50 (100%), [2,6-dichloroaniline + H<sub>2</sub>O]<sup>+</sup> 179.01 (10%)

*N*-(2,6 difluorophenyl)-*N'*-(2,4,6- trimethylphenyl) formamidine, **8**

White solid, Yield = 65%, m.p. = 233-235 °C, <sup>1</sup>H NMR (DMSO-*d*<sub>6</sub>) δ (ppm) = *E*<sub>syn</sub>: 2.22 (s, 6H, 2 x —CH<sub>3</sub>), 2.23 (3H, —CH<sub>3</sub>), 6.90-6.96 (m, 5H, aromatic H's), 7.83 (s, 1H, —N=C(H)—), 8.69 (s, 1H, —N(H)—), Selected peaks for *E*<sub>anti</sub>: 7.72 (s, —N=C(H)—), 9.13 (s, —N(H)—); <sup>13</sup>C NMR (DMSO-*d*<sub>6</sub>) δ(ppm) = 18.36, 18.63, 20.94, 111.81, 111.89, 111.98, 112.05, 121.85, 121.95, 128.79, 129.28, 130.07, 130.21, 133.55, 135.19, 135.74, 152.77, 154.96, 157.31; IR ν (cm<sup>-1</sup>): 3176, 2980, 2920, 2857, 2161, 2008, 1635, 1605, 1484, 1467, 1367, 1271, 1214, 1007, 986, 855, 775, 745, 710, 638, 580, 504, 439, 406; ESI-TOF MS: m/z (%); [M + Na]<sup>+</sup> 297.12 (100%), [1,3-difluoro-2-isocyanatobenzene + Na<sup>+</sup>]<sup>+</sup> 179.01 (20%)

### 2.1. Description of the photophysical properties of compounds 1-8

The UV-vis electronic absorption studies for compounds **1** – **8** were done in acetonitrile. The absorption spectra of all compounds were recorded between 200 – 450 nm in ethanol solutions with concentrations of ~10<sup>-5</sup> M and are shown in **Error! Reference source not found.** While the primary π-π transitions seem to be similar in all compounds, the n-π electronic transitions differ. For example, in the spectrum of compound **2** with the isopropyl substituents, the secondary band appears at about 236 nm, while in the spectrum of **3** with Cl substituents, it appears at about 256 nm. In comparing the secondary bands in the spectra, those for **1** and **3**, with methyl groups, lie between those of **2** (relatively hypsochromic shifted) and **4** (relatively bathochromic shifted), which is probably as a result of the differing electronic effects of the substituents (Table 2). The bathochromic shift is more enhanced in compound **8** with Cl and F substituents. However, when both electron withdrawing and electron donating groups are present, as in **5**, **6** and **7**, the shifts seem to be minimal; all three compounds have their secondary bands at around 243 nm. The presence of electronegative substituents in both rings, as in **4** and **8**, results in a decrease in band intensity, which could be due to the inductive effect of the halogen atoms.

**Table S1:** Selected geometric parameters of related formamidines from the CSD.

| Compound Name                                                                                       | CSD Refcode | Substituent(s)                                                    | Dihedral angle/ $^{\circ}$              |                                         |                                         |
|-----------------------------------------------------------------------------------------------------|-------------|-------------------------------------------------------------------|-----------------------------------------|-----------------------------------------|-----------------------------------------|
|                                                                                                     |             |                                                                   | $P_{(\text{Ring1})-P_{(\text{N-C=N})}}$ | $P_{(\text{N-C=N})-P_{(\text{Ring2})}}$ | $P_{(\text{Ring1})-P_{(\text{Ring2})}}$ |
| ethyl 4-[(anilinomethylidene)amino]-3-bromobenzoate                                                 | BUDBUA      | 4-[(anilinomethylidene)amino]-3-bromobenzoate                     | 50.768                                  | 24.796                                  | 42.924                                  |
| <i>N,N'</i> -bis(3,5-bis(trifluoromethyl)phenyl)imidoformamide                                      | GOVRAM      | 3,5-CF <sub>3</sub>                                               | 63.17                                   | 10.682                                  | 67.65                                   |
| methyl 4-[(4-(methoxycarbonyl)phenyl)imino]methylamino]benzoate                                     | KEYNEK      | *                                                                 | 39.76                                   | 9.484                                   | 34.505                                  |
| <i>N,N'</i> -bis(m-bromophenyl)formamidine                                                          | NEDBED      | 3-Br                                                              | 48.77                                   | 11.904                                  | 58.858                                  |
| <i>N,N'</i> -bis(p-fluorophenyl)formamidine                                                         | NEDBIH      | 4-F                                                               | 60.97                                   | 13.416                                  | 74.362                                  |
| <i>N,N'</i> -bis(p-fluorophenyl)formamidine                                                         | NEDBIH      | 4-F                                                               | 46.54                                   | 13.35                                   | 57.05                                   |
| <i>N,N'</i> -bis(p-methoxyphenyl)formamidine                                                        | NEDBON      | 4-OMe                                                             | 42.46                                   | 36.39                                   | 62.30                                   |
| <i>N,N'</i> -bis(p-methoxyphenyl)formamidine                                                        | NEDBON      | 4-OMe                                                             | 27.35                                   | 28.43                                   | 52.76                                   |
| ( <i>E</i> )- <i>N,N'</i> -bis(4-methoxyphenyl)formimidamide                                        | NEDBON01    | 4-OMe                                                             | 27.40                                   | 28.25                                   | 52.67                                   |
| ( <i>E</i> )- <i>N,N'</i> -bis(4-methoxyphenyl)formimidamide                                        | NEDBON01    | 4-OMe                                                             | 42.24                                   | 36.23                                   | 62.21                                   |
| <i>N,N'</i> -bis(p-nitrophenyl)formamidine                                                          | NEDCAA      | 4-NO <sub>2</sub>                                                 | 47.99                                   | 13.69                                   | 60.35                                   |
| 2,3-dimethyl-2,3-bis(3-isopropyl-2-( <i>N'</i> - (2,6-diisopropylphenyl)formamidinato)phenyl)butane | NIVSER      | 2,3-dimethyl-2,3-bis(3-isopropyl-2-( <i>N'</i> - (2,6-diisopropyl | 53.77                                   | 85.68                                   | 63.15                                   |
| <i>N,N'</i> -bis(pentafluorophenyl)methanimidamide benzene solvate                                  | NUBZAO      | 2,3,4,5,6-F                                                       | 45.362                                  | 44.670                                  | 31.515                                  |
| <i>N,N'</i> -bis(2,3,5-trifluorophenyl)formamidine                                                  | OWAPUY      | 2,3,5-F                                                           | 33.86                                   | 28.63                                   | 15.46                                   |
| <i>N,N'</i> -bis(2,3,5-trifluorophenyl)formamidine                                                  | OWAPUY      | 2,3,5-F                                                           | 47.57                                   | 31.72                                   | 35.89                                   |
| <i>N,N'</i> -bis(3,4,5-trifluorophenyl)formamidine                                                  | OWAQAF      | 3,4,5-F                                                           | 55.65                                   | 8.383                                   | 64.02                                   |

|                                                                |          |                 |       |        |        |
|----------------------------------------------------------------|----------|-----------------|-------|--------|--------|
| <i>N,N'</i> -bis(pentafluorophenyl)formamidine toluene solvate | OWAQEJ   | 2,3,4,5,6-F     | 43.36 | 39.17  | 32.21  |
| <i>N,N'</i> -bis(2,6-difluorophenyl)formamidine                | OWAQIN   | 2,6-F           | 46.36 | 36.56  | 18.67  |
| <i>N,N'</i> -di(p-tolyl)formamidine                            | ROLGEE   | 4-Me            | 47.71 | 27.06  | 67.14  |
| <i>N,N'</i> -bis(p-tolyl)formamidine                           | ROLGEE01 | 4-Me            | 47.88 | 26.93  | 67.15  |
| <i>N,N'</i> -di(p-tolyl)formamidine                            | ROLGEE02 | 4-Me            | 47.30 | 29.67  | 36.79  |
| <i>N,N'</i> -di(p-tolyl)formamidine                            | ROLGEE02 | 4-Me            | 37.34 | 11.13  | 30.72  |
| <i>N,N'</i> -bis(2,6-diisopropylphenyl)formamidine             | TEVJOU   | 2,6-diisopropyl | 85.16 | 71.91  | 44.89  |
| <i>N,N'</i> -bis(2,6-diisopropylphenyl)formamidine             | TEVJOU01 | 2,6-diisopropyl | 72.91 | 71.86  | 67.22  |
| <i>N,N'</i> -bis(2,6-diisopropylphenyl)imidiformamide          | TEVJOU02 | 2,6-diisopropyl | 69.53 | 71.80  | 67.64  |
| <i>N,N'</i> -bis(2,6-diisopropylphenyl)formamidine             | TEVJOU03 | 2,6-diisopropyl | 87.51 | 69.273 | 43.732 |
| <i>N,N'</i> -bis(2,6-diisopropylphenyl)formamidine             | TEVJOU03 | 2,6-diisopropyl | 80.24 | 71.815 | 44.863 |
| <i>N,N'</i> -bis(2-methoxyphenyl)formamidine                   | XUGZUU   | 2-OMe           | 47.30 | 37.08  | 38.09  |
| <i>N,N'</i> -bis(2-methoxyphenyl)imidiformamide                | XUGZUU01 | 2-OMe           | 46.50 | 35.86  | 37.27  |
| <i>N,N'</i> -bis(2-ethoxyphenyl)formamidine                    | XUHBAD   | 2-OEt           | 41.97 | 38.68  | 30.62  |
| <i>N,N'</i> -bis(2-ethoxyphenyl)formamidine                    | XUHBAD   | 2-OEt           | 34.66 | 42.06  | 28.82  |
| <i>N,N'</i> -bis(3-methoxyphenyl)formamidine                   | XUHBEH   | 3-OEt           | 46.40 | 11.92  | 40.27  |
| <i>N,N'</i> -bis(3-n-butoxyphenyl)formamidine                  | XUHBIL   | 3-Obu           | 47.49 | 3.324  | 50.63  |
| <i>N,N'</i> -bis(3,5-dichlorophenyl)imidiformamide             | ZIPKUG   | 3,5-Cl          | 45.98 | 26.49  | 69.94  |

\*[4-(methoxycarbonyl)]

**Table S2:** Selected intermolecular interaction parameters in compounds **4** – **8**.

| $D-H/X\cdots A$                                            | $D-H/X$  | $H/X\cdots A$ | $D\cdots A$ | $D-H/X\cdots A$ |
|------------------------------------------------------------|----------|---------------|-------------|-----------------|
| <b>Compound 4</b>                                          |          |               |             |                 |
| $N1A-H1A\cdots N2A^i$                                      | 0.88     | 2.04          | 2.917(1)    | 174             |
| $N1B-H1B\cdots N2B^{ii}$                                   | 0.88     | 2.01          | 2.878(1)    | 169             |
| $C7B-H7B\cdots\pi_{2,6}\text{-dichloro}^{ii}$              | 0.95     | 2.49          | 3.389(1)    | 158             |
| $C2B-Cl1B\cdots\pi_{2,6}\text{-dichloro}^{ii}$             | 1.728(1) | 3.7038(8)     | 3.788(1)    | 82              |
| <b>Compound 5</b>                                          |          |               |             |                 |
| $N2A-H2A\cdots N1A^i$                                      | 0.88     | 1.98          | 2.850(4)    | 168             |
| $N2B-H2B\cdots N1B^{ii}$                                   | 0.88     | 1.97          | 2.840(4)    | 171             |
| $C7A-H7A\cdots\pi_{2,6}\text{-dimethyl}$                   | 0.95     | 2.49          | 3.306(4)    | 143             |
| $C7B-H7B\cdots\pi_{2,6}\text{-dimethyl}$                   | 0.95     | 2.43          | 3.219(4)    | 141             |
| $C6B-Cl2B\cdots\pi_{2,6}\text{-dimethyl}$                  | 1.709(2) | 3.774(2)      | 3.958(2)    | 83              |
| <b>Compound 6</b>                                          |          |               |             |                 |
| $N2-H2\cdots N1^i$                                         | 0.88     | 2.06          | 2.914(1)    | 163             |
| <b>Compound 6</b>                                          |          |               |             |                 |
| $N2-H2\cdots N1^i$                                         | 0.88     | 2.17          | 2.953(3)    | 149             |
| $C7-H7\cdots\pi_{\text{mesityl}}^i$                        | 0.95     | 2.58          | 3.451(3)    | 152             |
| $C16-H16A\cdots\pi_{2,6}\text{-dichloro}^{ii}$             | 0.95     | 2.80          | 3.498(4)    | 128             |
| <b>Compound 8</b>                                          |          |               |             |                 |
| $N2A-H2A\cdots N1A^i$                                      | 0.88     | 2.22          | 2.971(1)    | 143             |
| $N2B-H2B\cdots N1B$                                        | 0.88     | 2.20          | 2.950(2)    | 143             |
| $C7A-H7A\cdots\pi_{\text{mesityl}}^i$                      | 0.95     | 2.75          | 3.519(1)    | 138             |
| $C7B-H7B\cdots\pi_{\text{mesityl}}$                        | 0.95     | 2.74          | 3.519(1)    | 140             |
| $\pi_{\text{mesityl}}\cdots\pi_{2,6}\text{-difluoro}$      | -        | -             | 3.7494(8)   | -               |
| $\pi_{\text{mesityl}}\cdots\pi_{2,6}\text{-difluoro}^{ii}$ | -        | -             | 3.8303(7)   | -               |

Symmetry codes for Compound **1**: (i)  $-x, -y, -z+1$ , (ii)  $-x+1, y-1/2, -z+3/2$ ; Compound **2**: (i)  $x-1/2, -y+1/2, z-1/2$ , (ii)  $x, -y, z-1/2$ ; Compound **3**: (i)  $1-x, y-1/2, 3/2-z, 1-x, y+1/2, 3/2-z$ ; Compound **4**: (i)  $-x+1, -y+1, -z+1$ . Compound **8**: (i)  $1/2+x, 1/2-y, 1/2+z$ , (ii)  $-1/2+x, 1/2-y, -1/2+z$



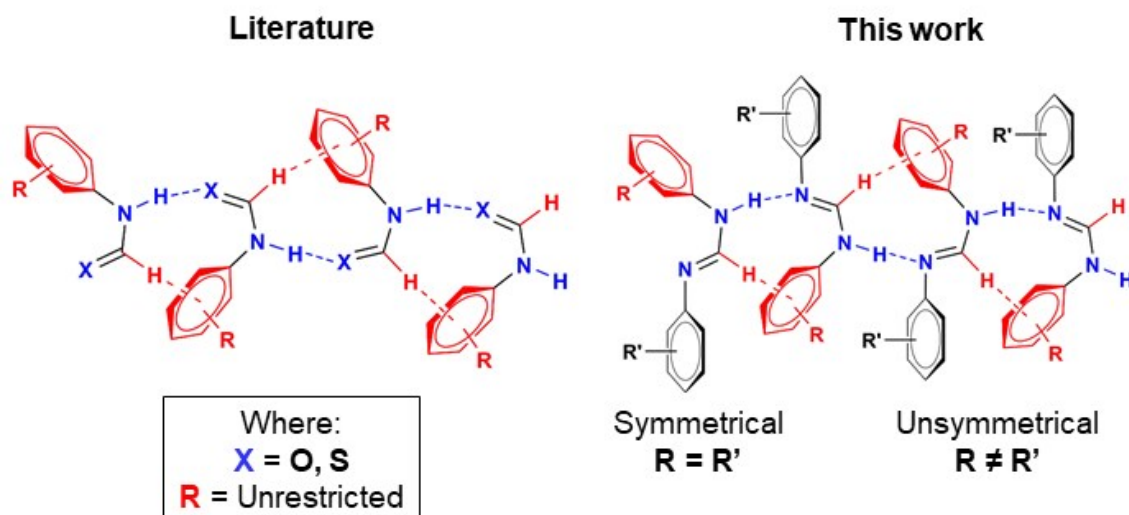

**Figure S2:** Comparison of C—H... $\pi$  and classical hydrogen bonding patterns found in closely related crystal structures in the CSD and this work.

**Table S3:** CSD search hits and their respective C—H... $\pi$  and classical hydrogen bonding geometric parameters

| Compound Name                                                                                             | Refcode  | H... $\pi/\text{\AA}$ | H...X/ $\text{\AA}$ | C-H...PI/ $^\circ$ | N-H...X/ $^\circ$ |
|-----------------------------------------------------------------------------------------------------------|----------|-----------------------|---------------------|--------------------|-------------------|
| <i>N</i> -(2,6-Diisopropylphenyl)thioformamide                                                            | QECGOW   | 2.749                 | 2.494               | 160                | 167               |
| <i>N</i> -(11-(Methylamino)tricyclo[8.2.2.2 $S_4$ ,7!])hexadecan-1(12),4,6,10,13,15-hexaen-5-yl)formamide | QULWEB   | 2.683                 | 2.019               | 174                | 168               |
| ( <i>Z</i> )-3-(4-formamidophenyl)-2,4-pentanedione                                                       | DUZYED   | 2.837                 | 2.029               | 160                | 170               |
| <i>N</i> -(2,6-Di-isopropylphenyl)formamide                                                               | TEVJIO01 | 2.803                 | 2.038               | 159                | 171               |
| <i>N</i> -(2,4,6-Trimethylphenyl)formamide                                                                | QAKDAJ   | 2.726                 | 2.054               | 129                | 171               |
| <i>N</i> -(2,6-Di-isopropylphenyl)formamide                                                               | TEVJIO   | 2.891                 | 2.115               | 157                | 174               |
| 1,2-bis(Formylamino)benzene                                                                               | ALOSAV   | 2.798                 | 1.886               | 168                | 174               |

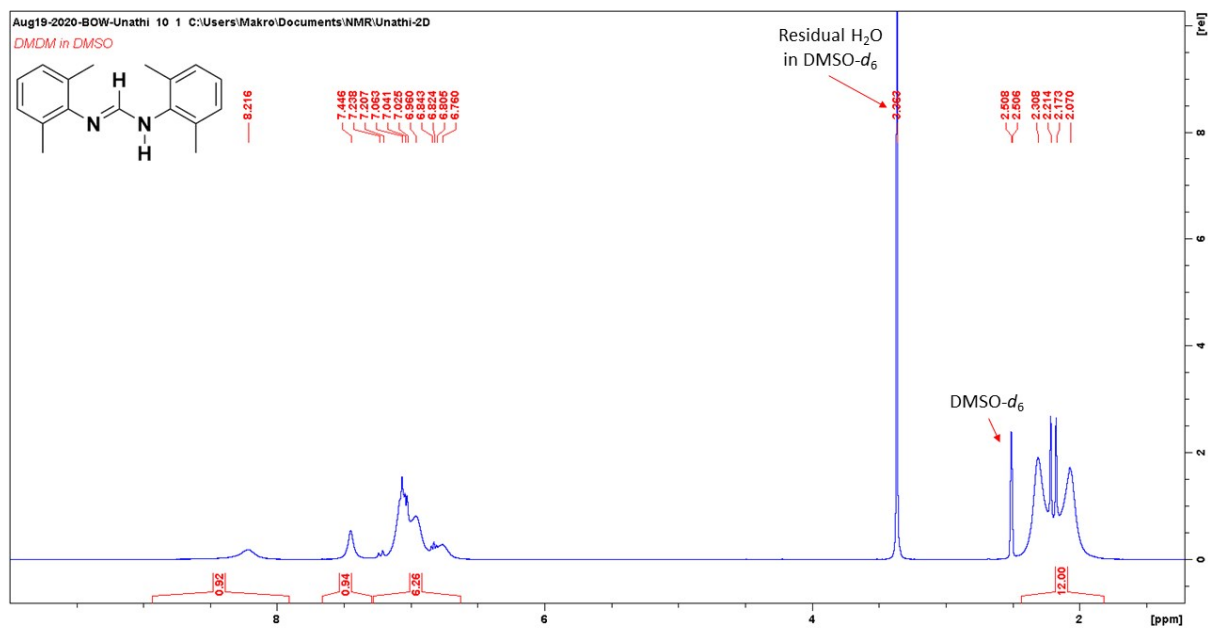

Figure S3: <sup>1</sup>H NMR spectrum of 1 in DMSO-d<sub>6</sub>

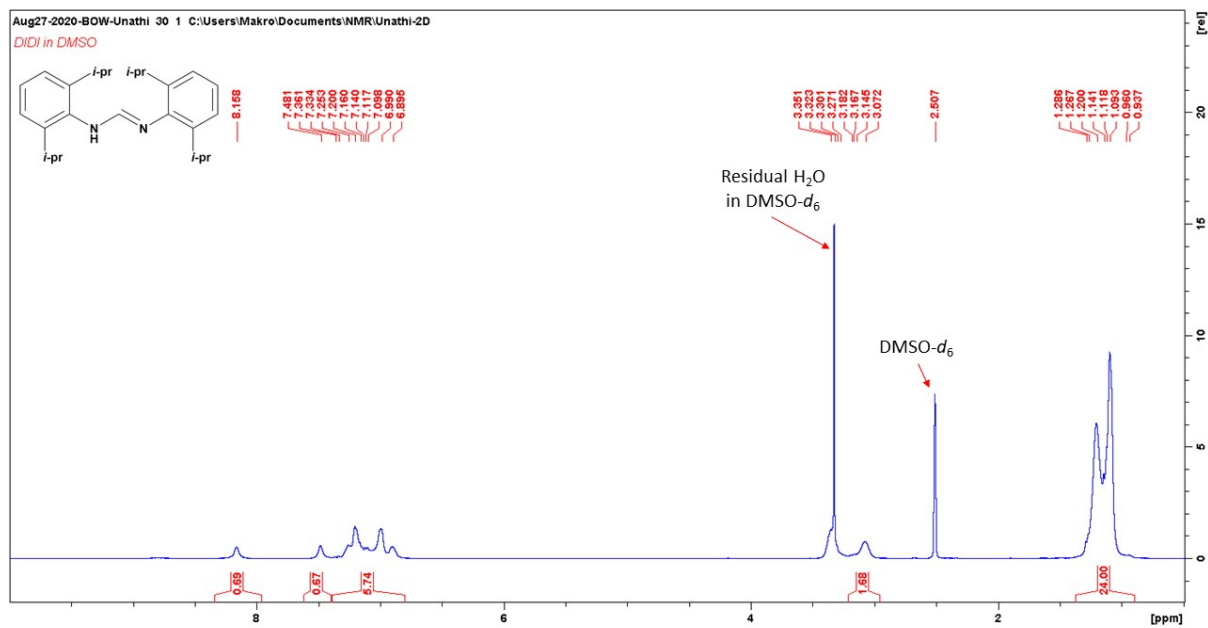

Figure S4: <sup>1</sup>H NMR spectrum of 2 in DMSO-d<sub>6</sub>

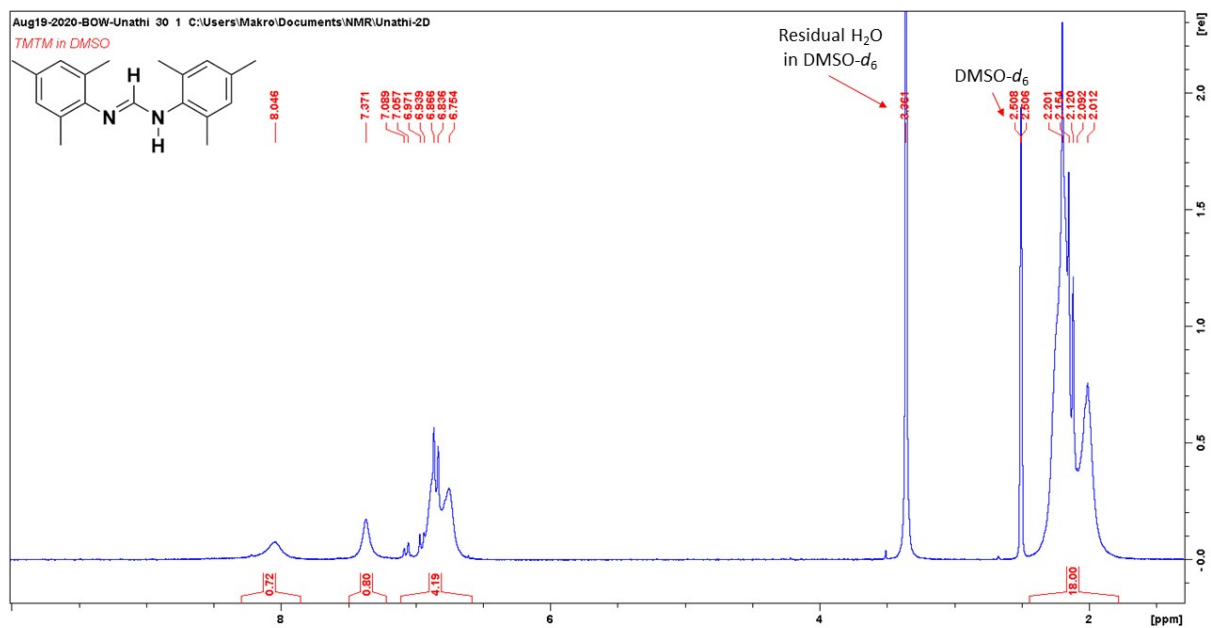

Figure S5: <sup>1</sup>H NMR spectrum of **3** in DMSO-d<sub>6</sub>

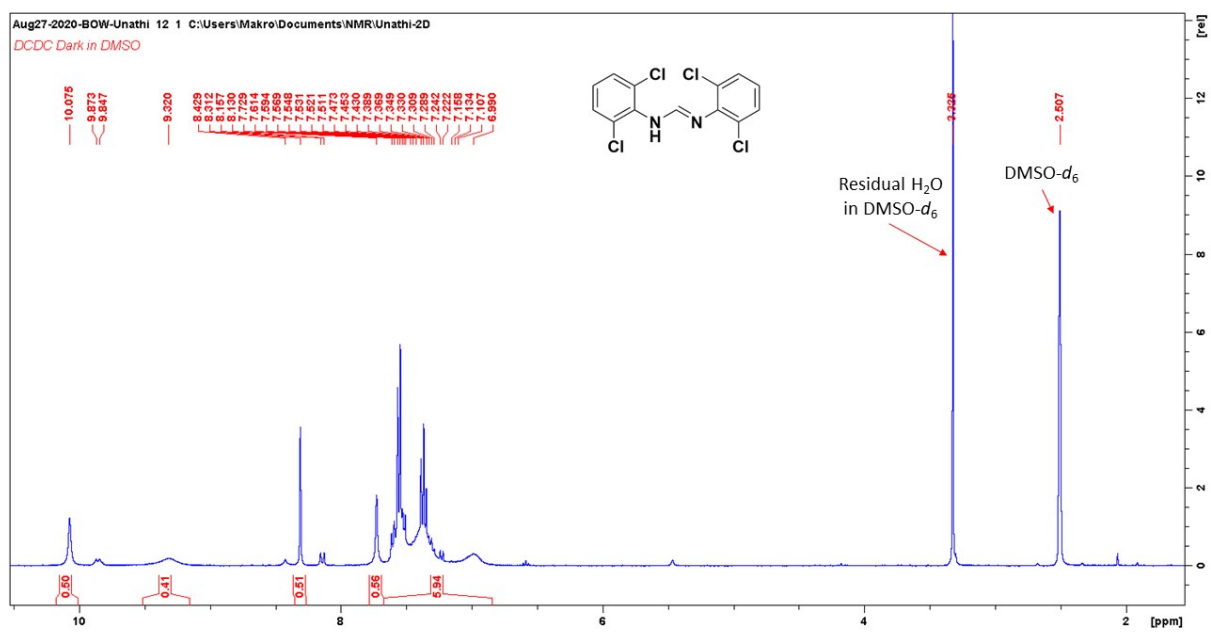

Figure S6: <sup>1</sup>H NMR spectrum of **4** in DMSO-d<sub>6</sub>

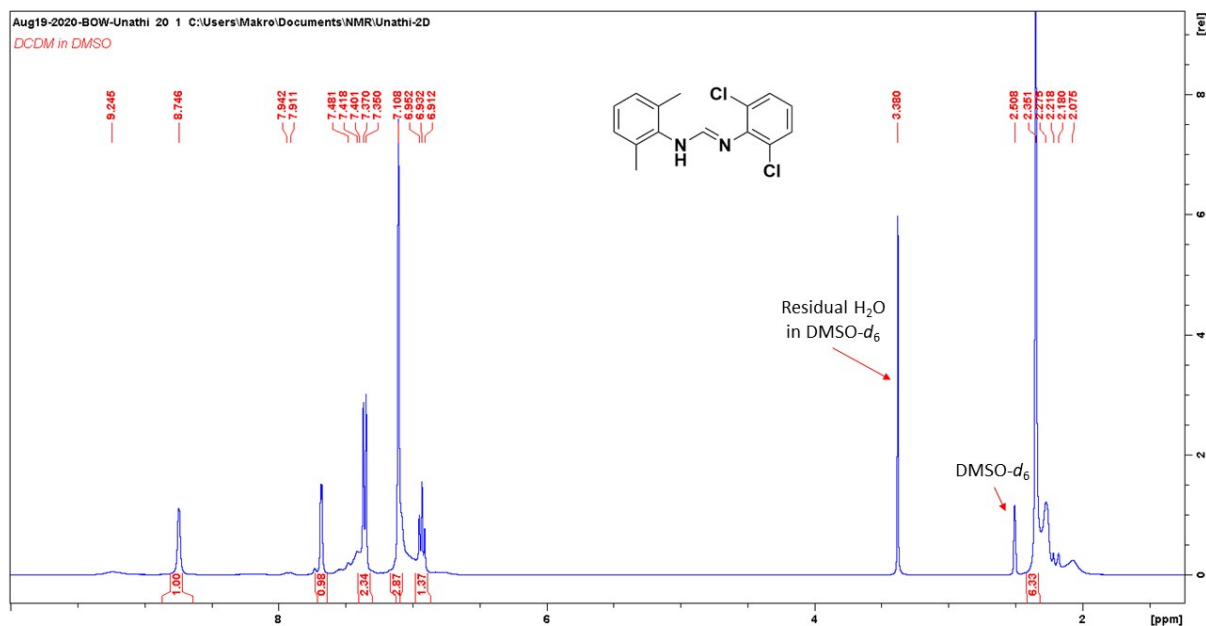

Figure S7: <sup>1</sup>H NMR spectrum of **5** in DMSO-*d*<sub>6</sub>

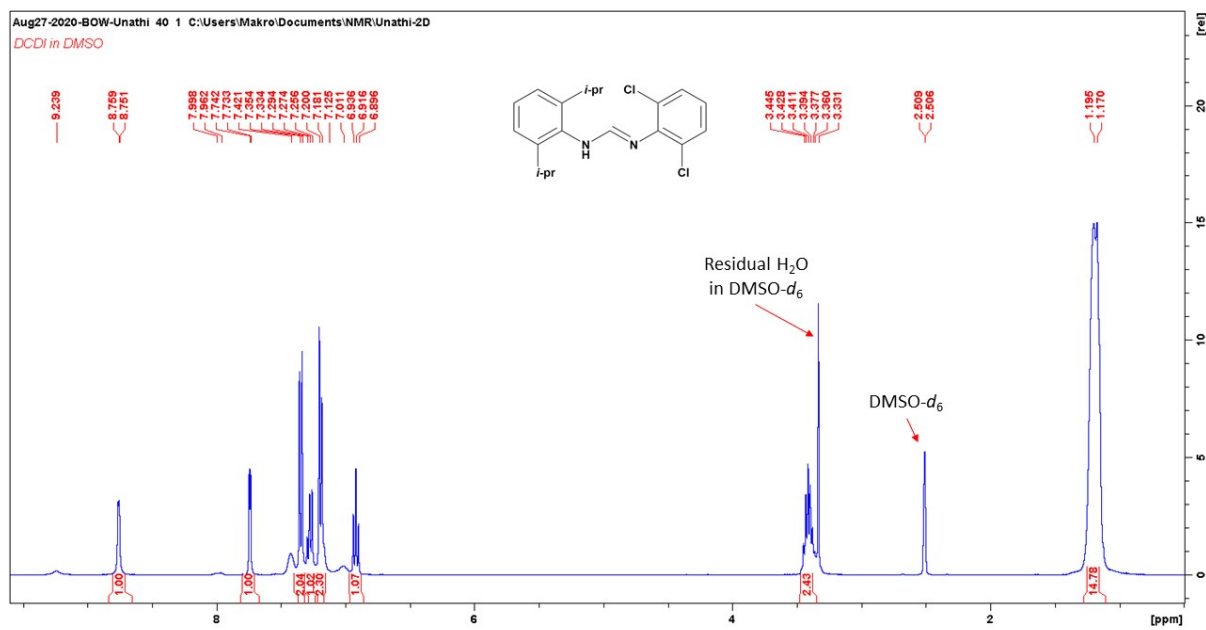

Figure S8: <sup>1</sup>H NMR spectrum of **6** in DMSO-*d*<sub>6</sub>

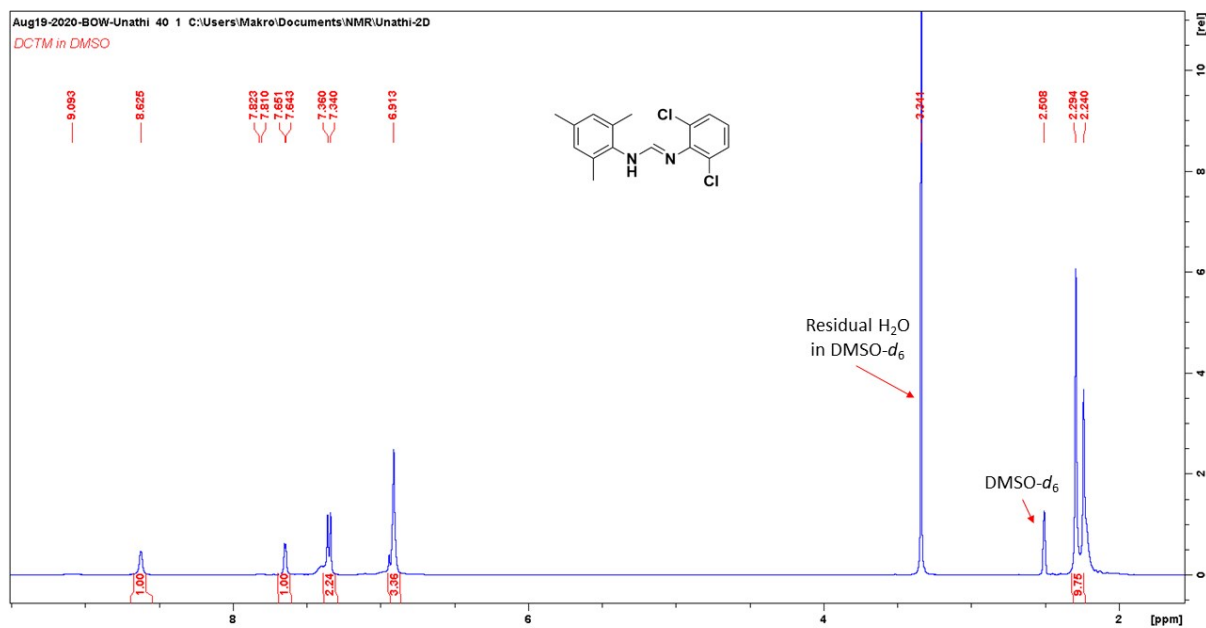

Figure S9: <sup>1</sup>H NMR spectrum of **7** in DMSO-*d*<sub>6</sub>

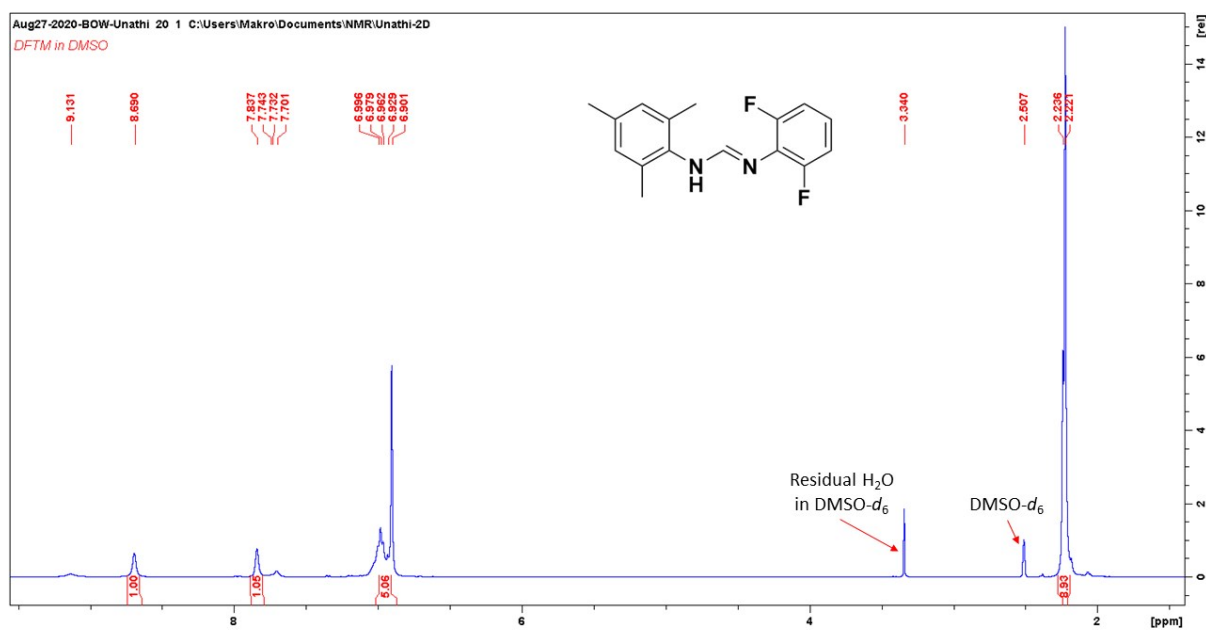

Figure S10 <sup>1</sup>H NMR spectrum of **8** in DMSO-*d*<sub>6</sub>

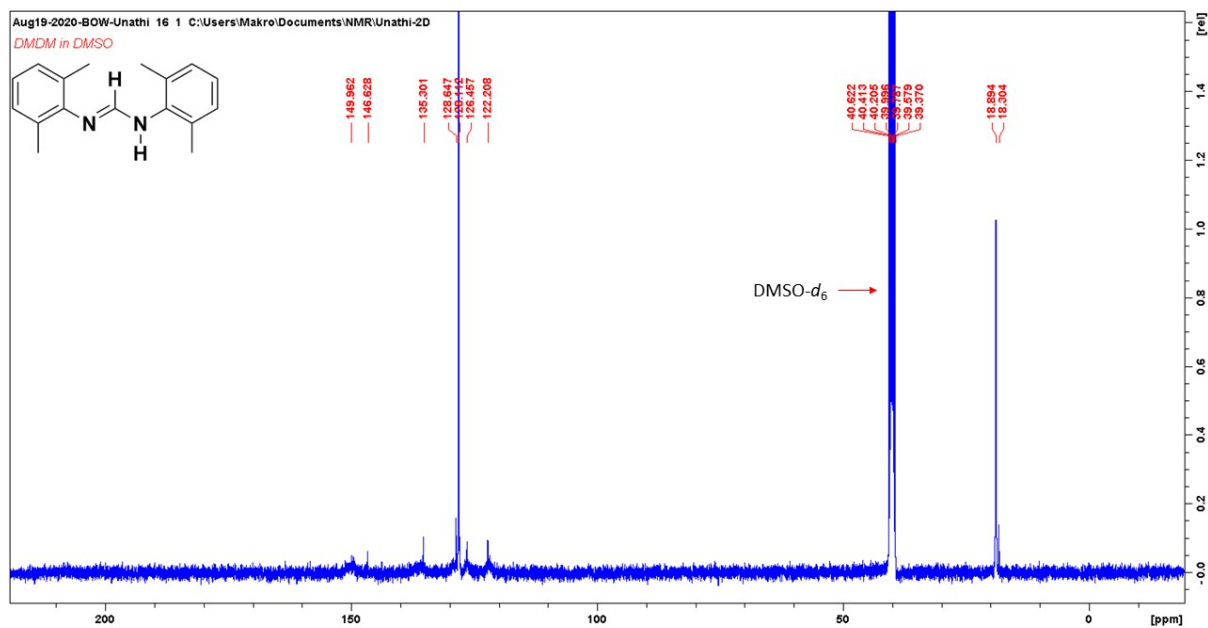

Figure S11:  $^{13}\text{C}$  NMR spectrum of **1** in DMSO- $d_6$

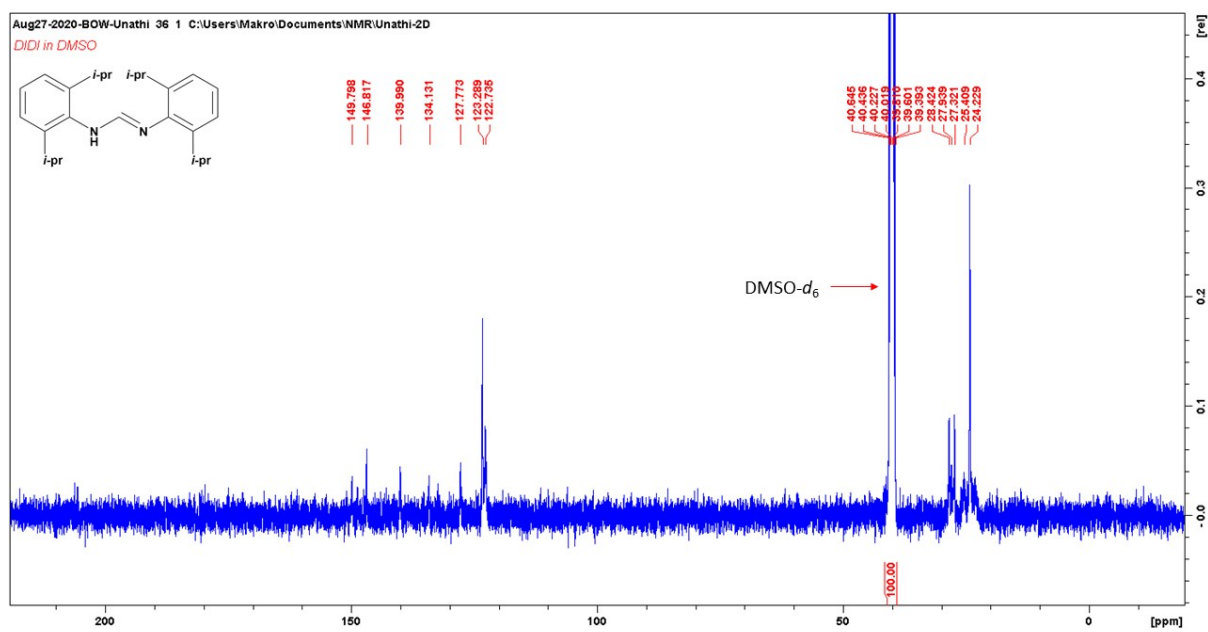

Figure S1:  $^{13}\text{C}$  NMR spectrum of **2** in DMSO- $d_6$

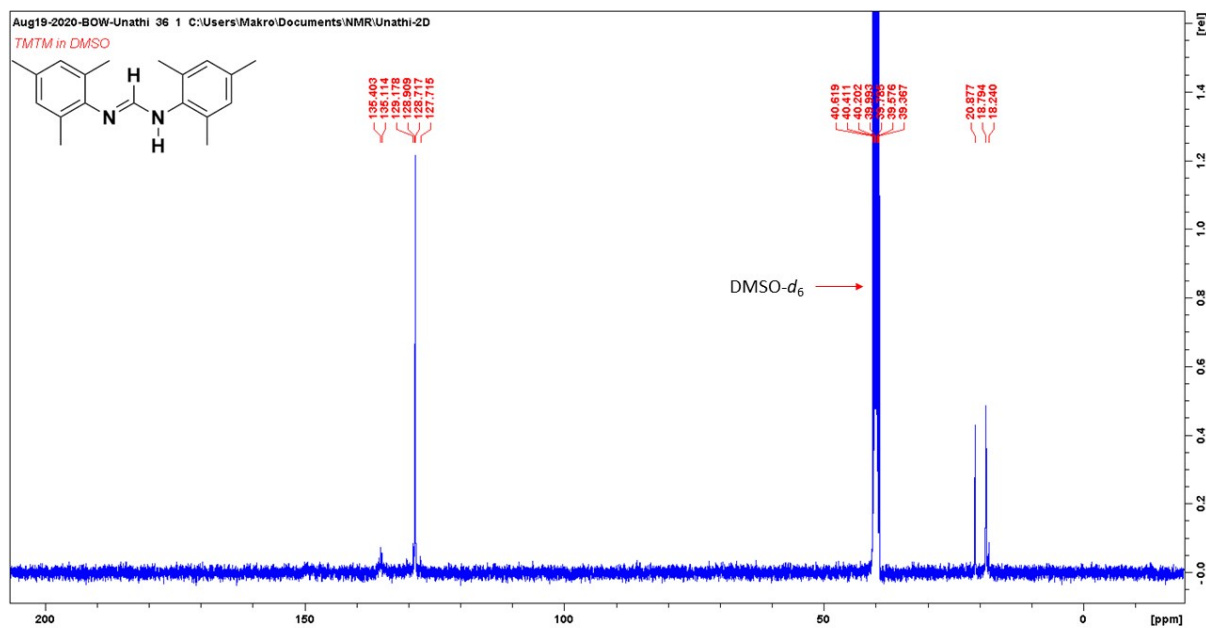

Figure S13:  $^{13}\text{C}$  NMR spectrum of **3** in DMSO- $d_6$

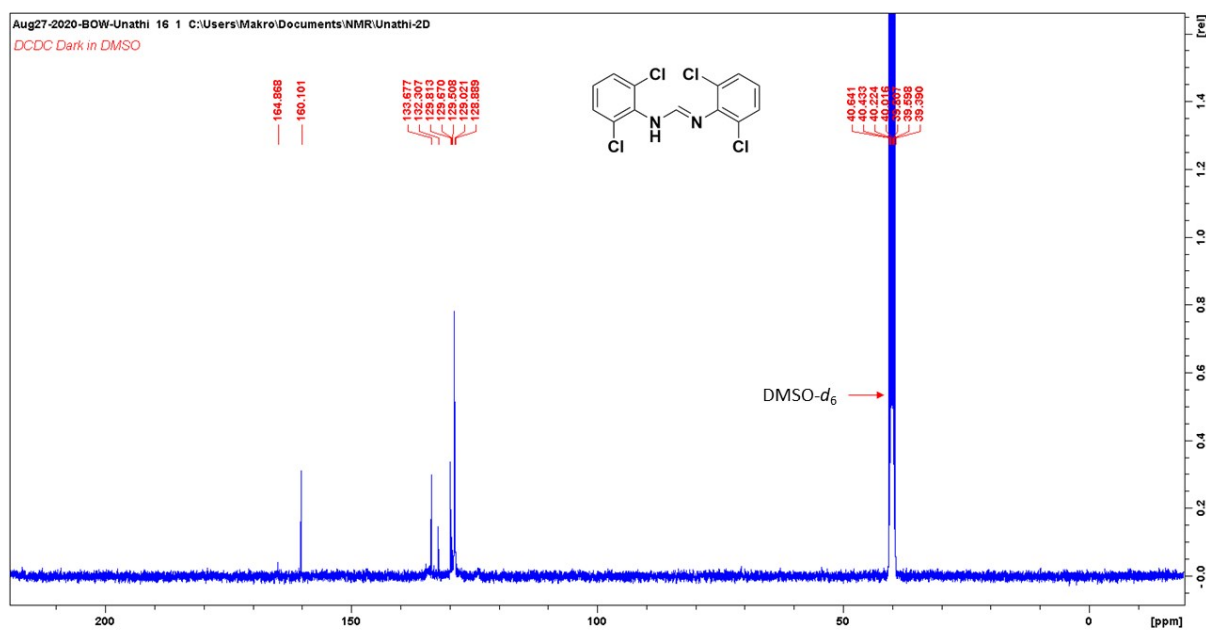

Figure S2:  $^{13}\text{C}$  NMR spectrum of **4** in DMSO- $d_6$

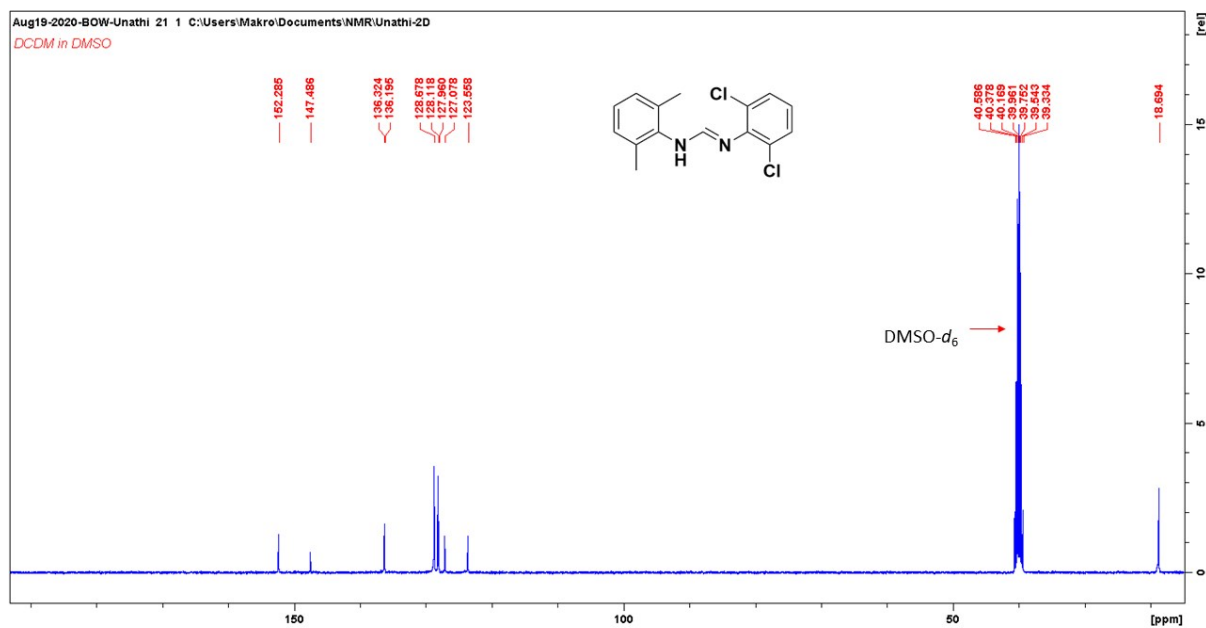

Figure S3:  $^{13}\text{C}$  NMR spectrum of 5 in DMSO- $d_6$

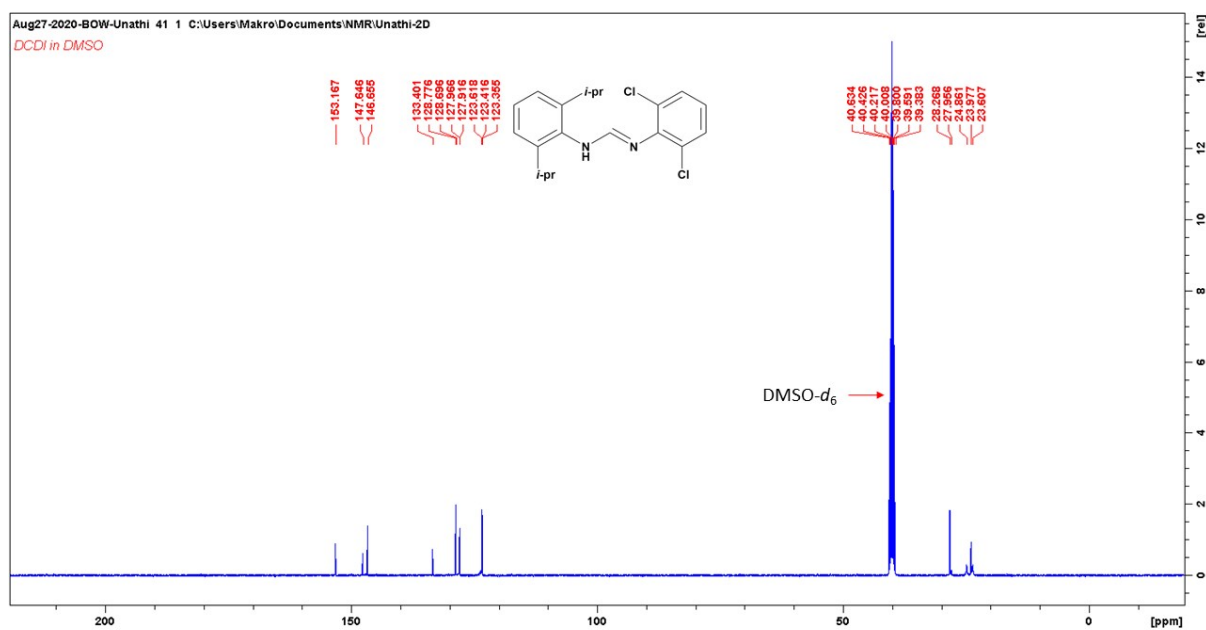

Figure S4:  $^{13}\text{C}$  NMR spectrum of 6 in DMSO- $d_6$



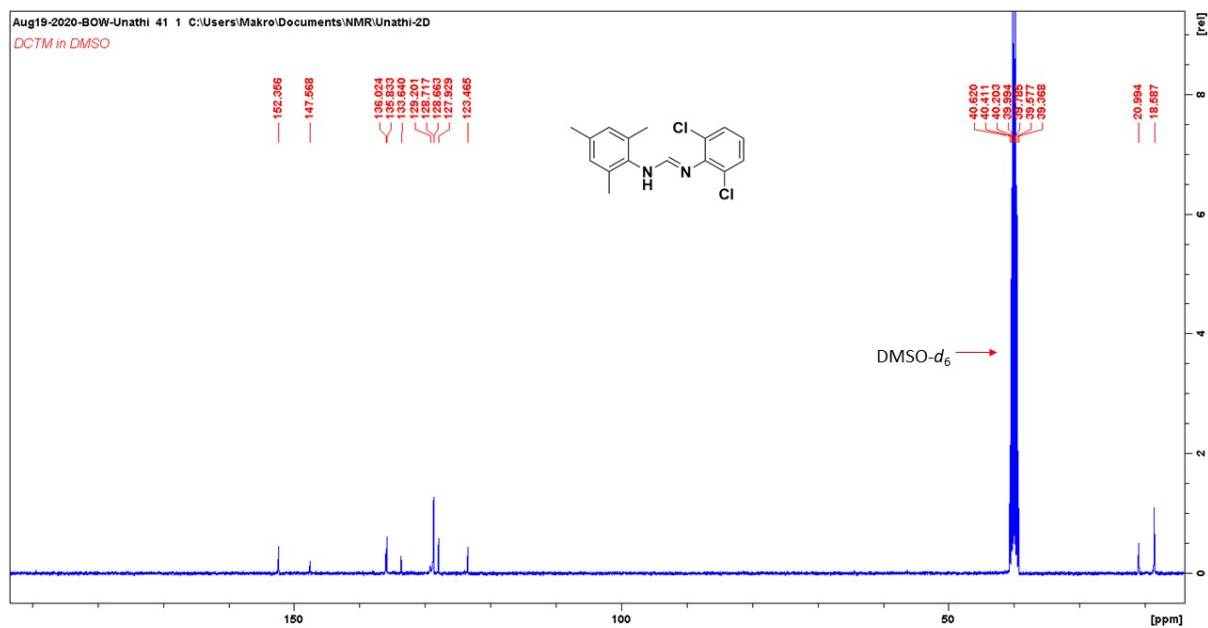

Figure S5:  $^{13}\text{C}$  NMR spectrum of **7** in DMSO- $d_6$

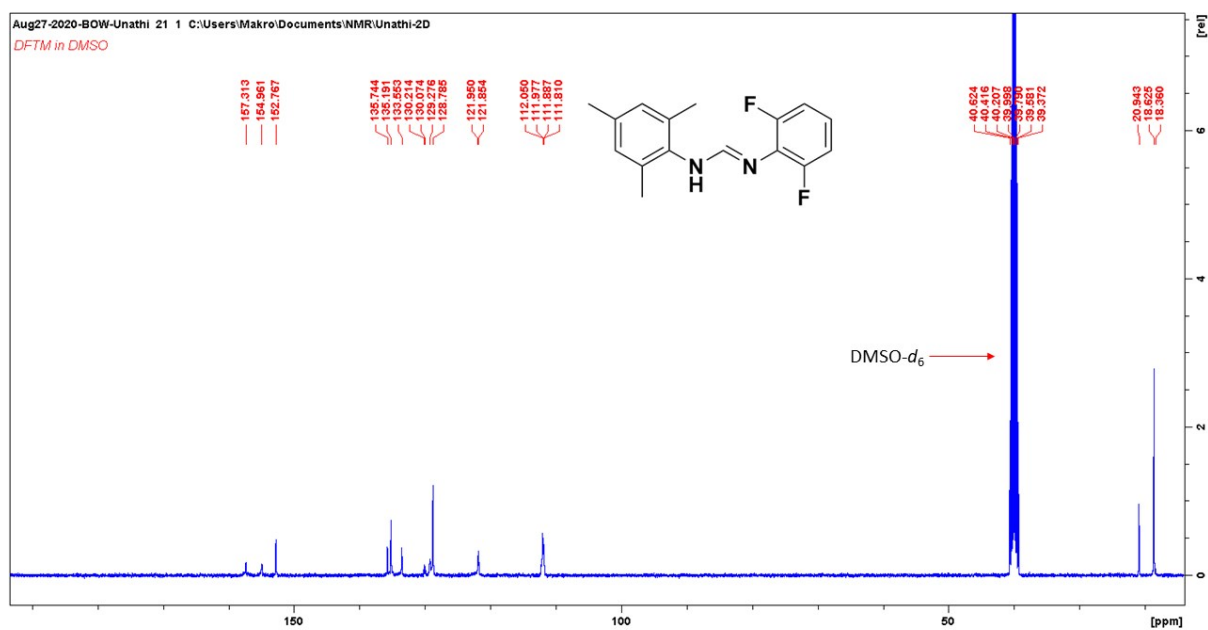

Figure S68:  $^{13}\text{C}$  NMR spectrum of **8** in DMSO- $d_6$

## IR spectra of compounds 1-8

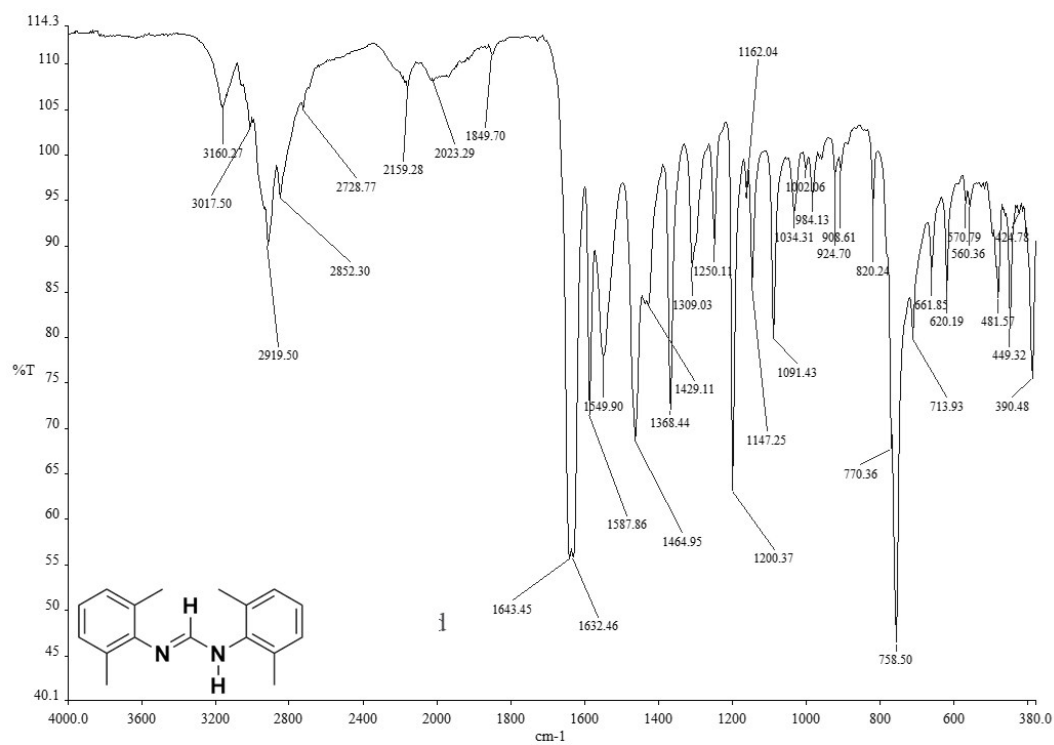

Figure S79: IR spectrum of 1

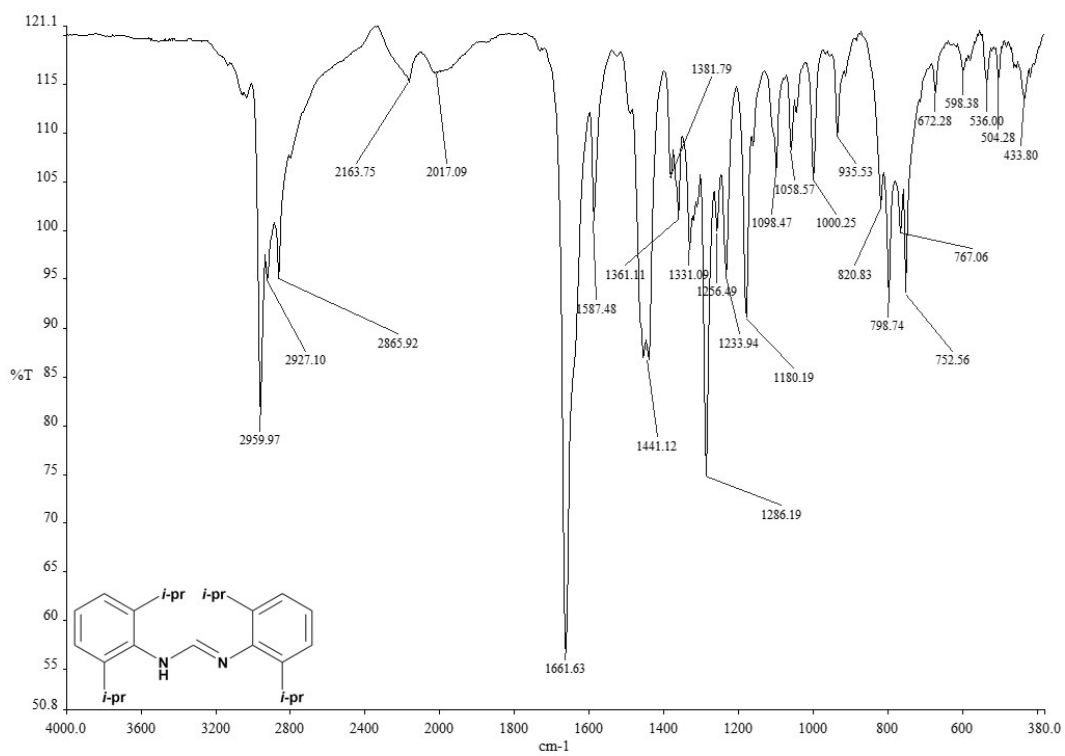

Figure S20: IR spectrum of 2

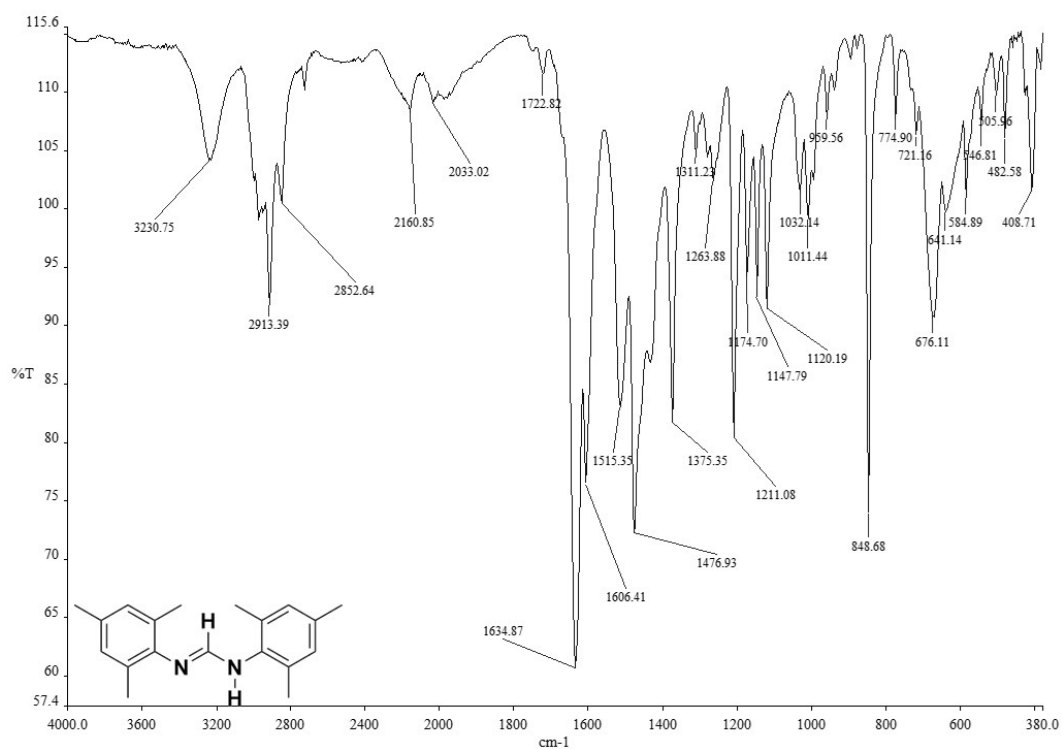

Figure S21: IR spectrum of 3

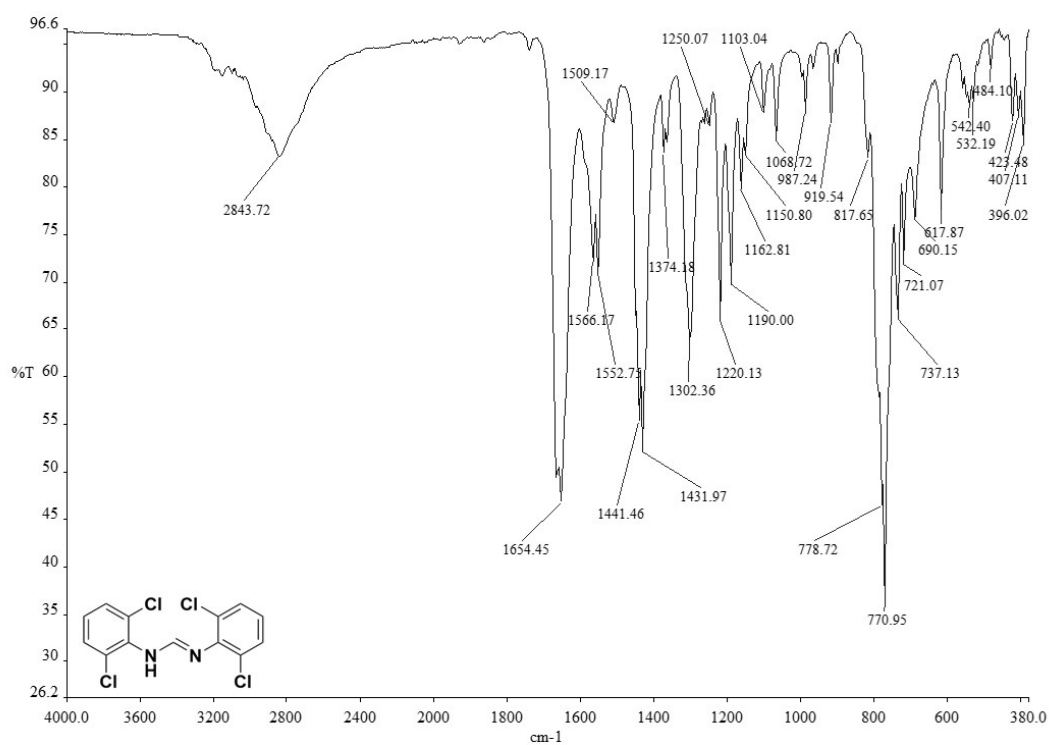

Figure S22: IR spectrum of 4

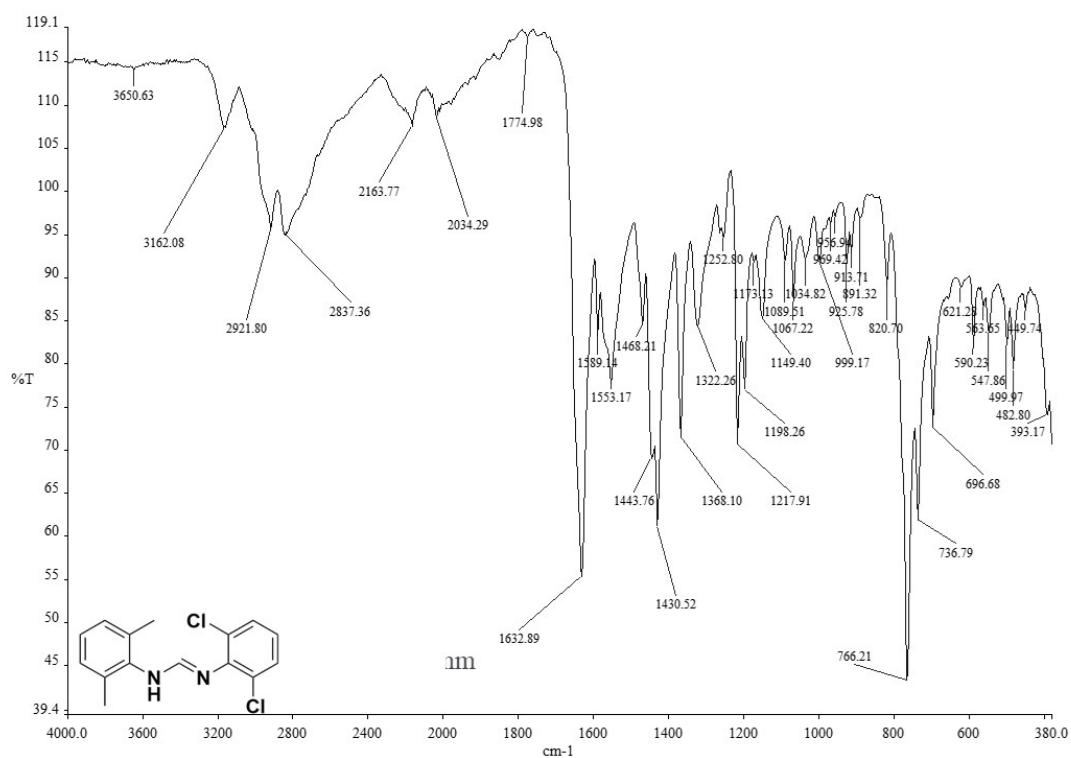

Figure S23: IR spectrum of 5

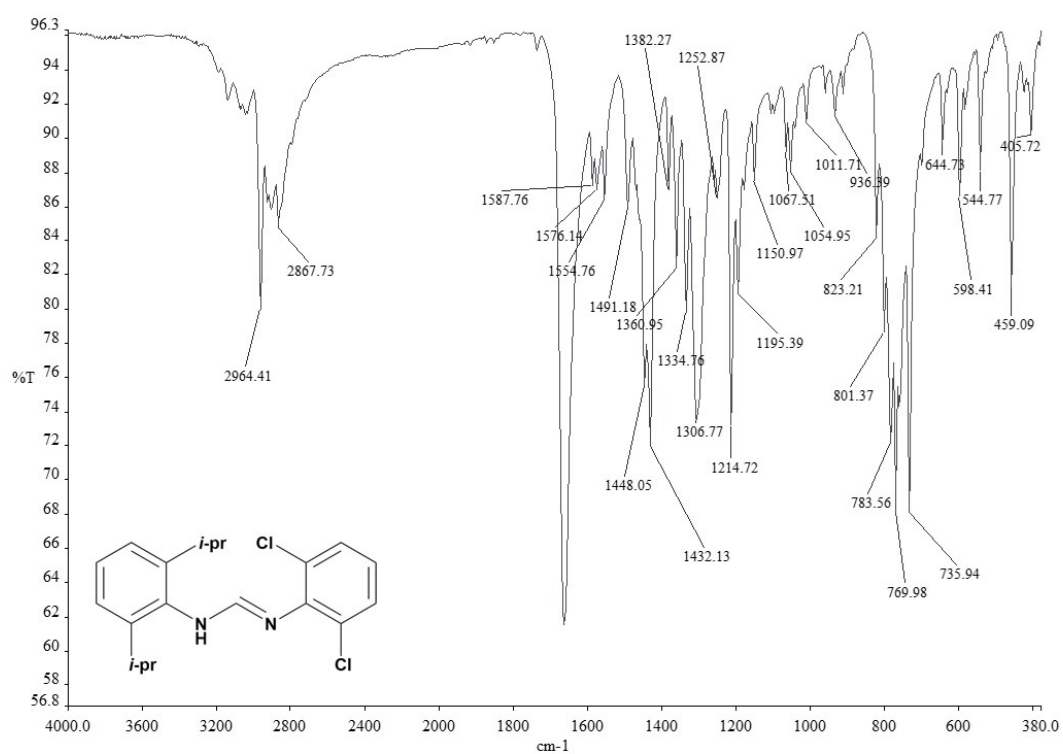

Figure S24: IR spectrum of 6

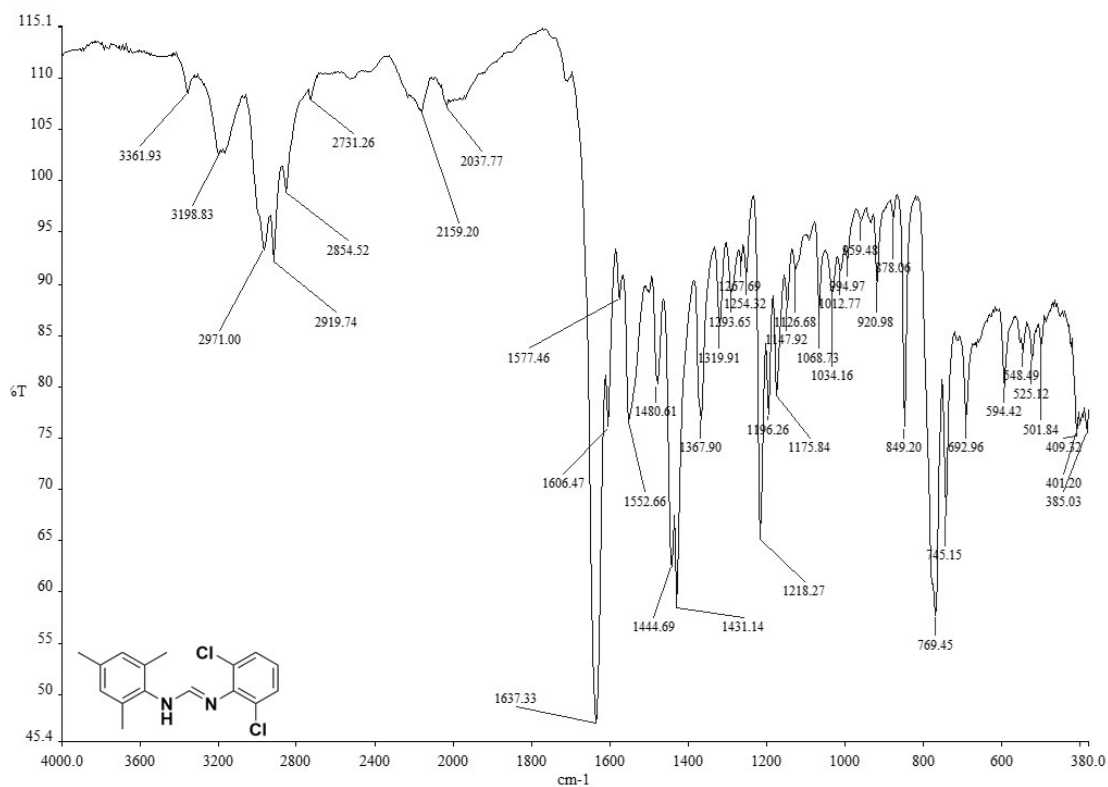

Figure S25: IR spectrum of 7

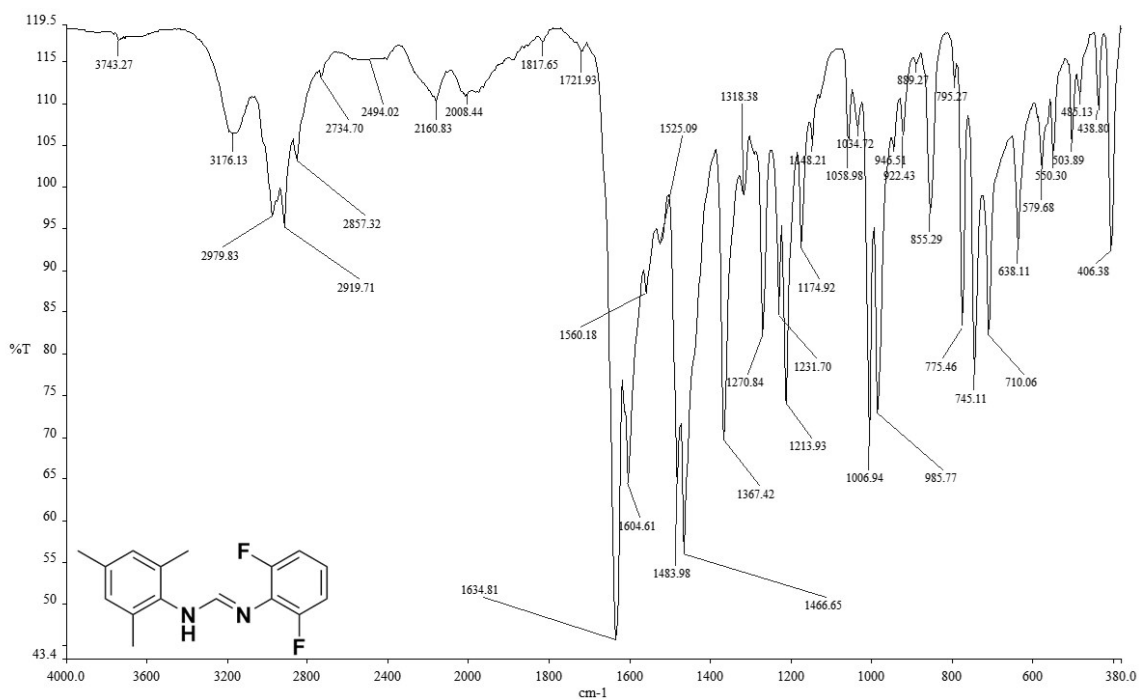

Figure S26: IR spectrum of 8

# Mass spectra of compounds 1-8

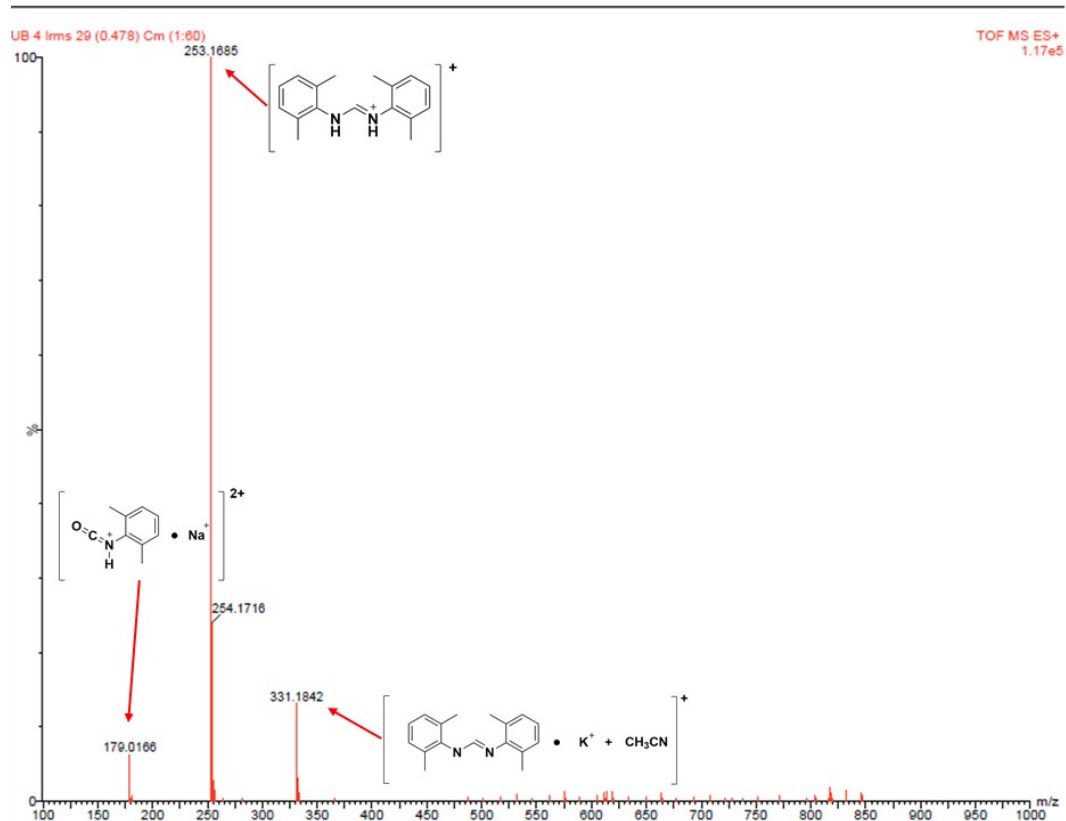

Figure S27: ESI-MS(+) spectrum of **1**

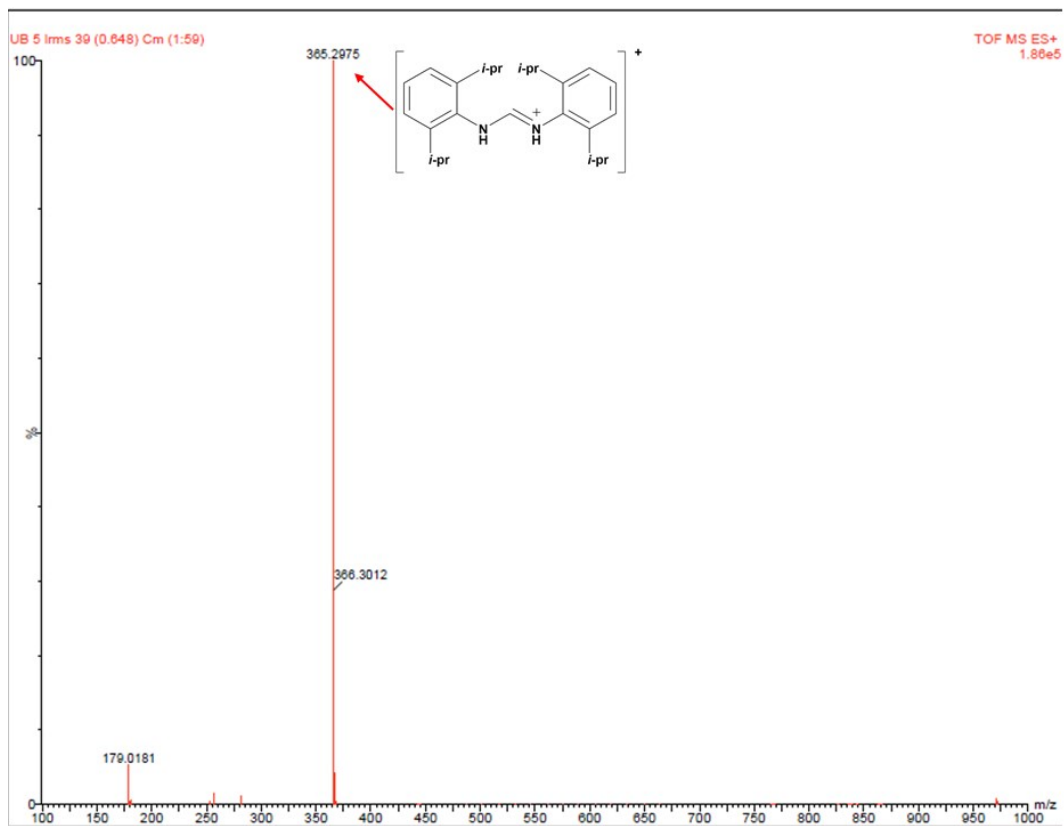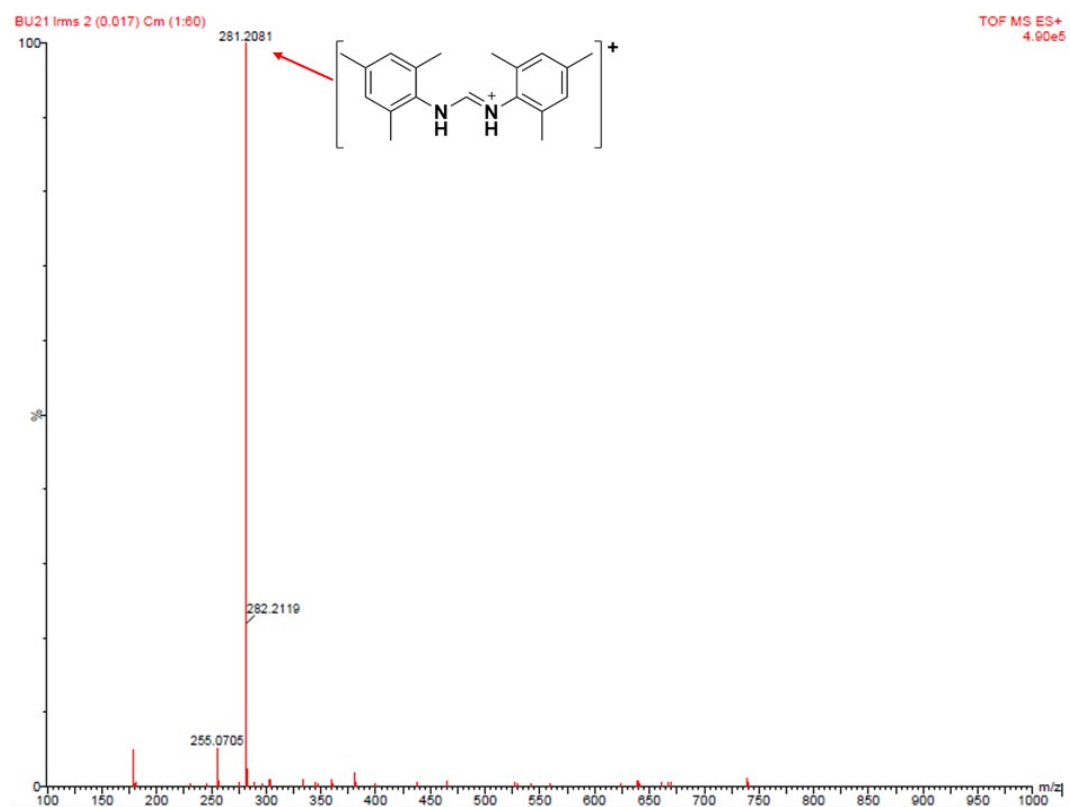

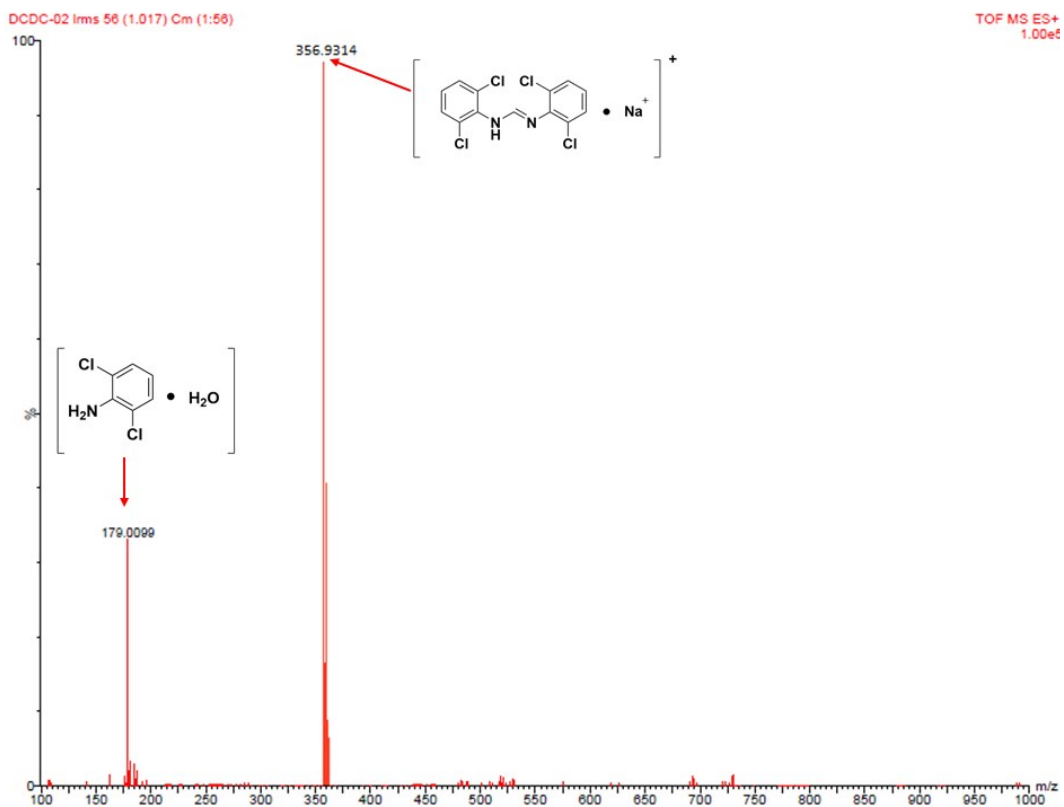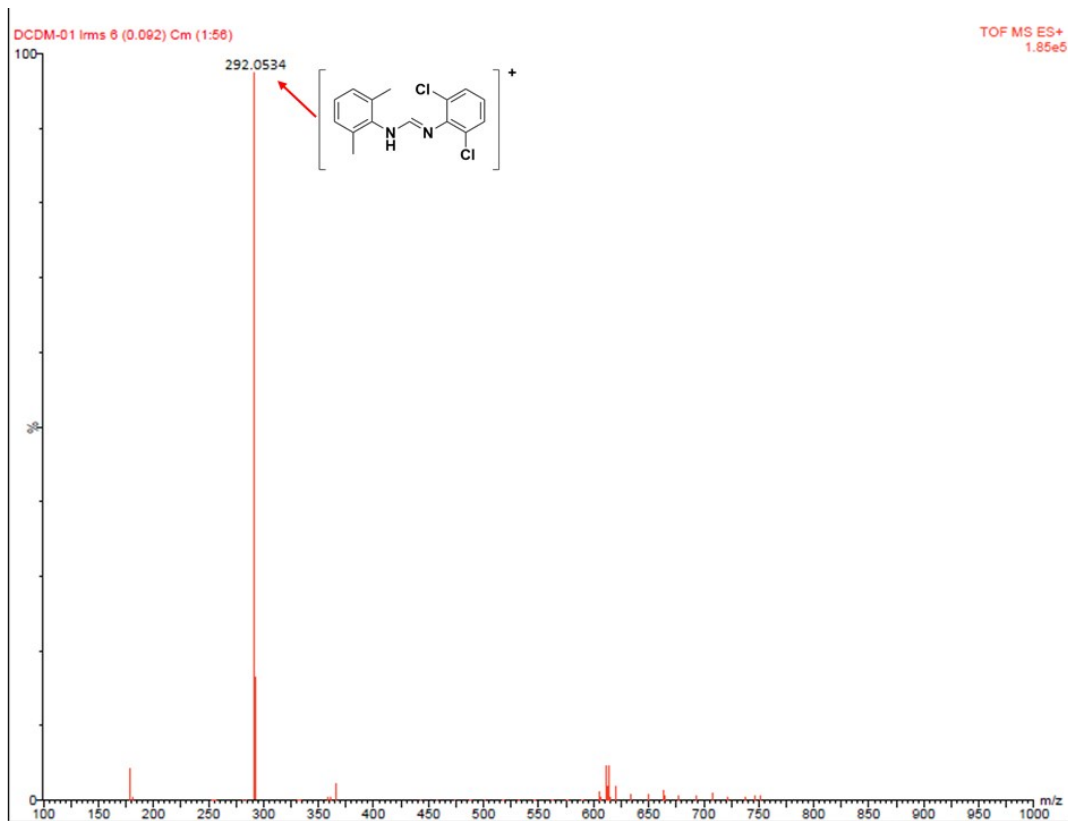



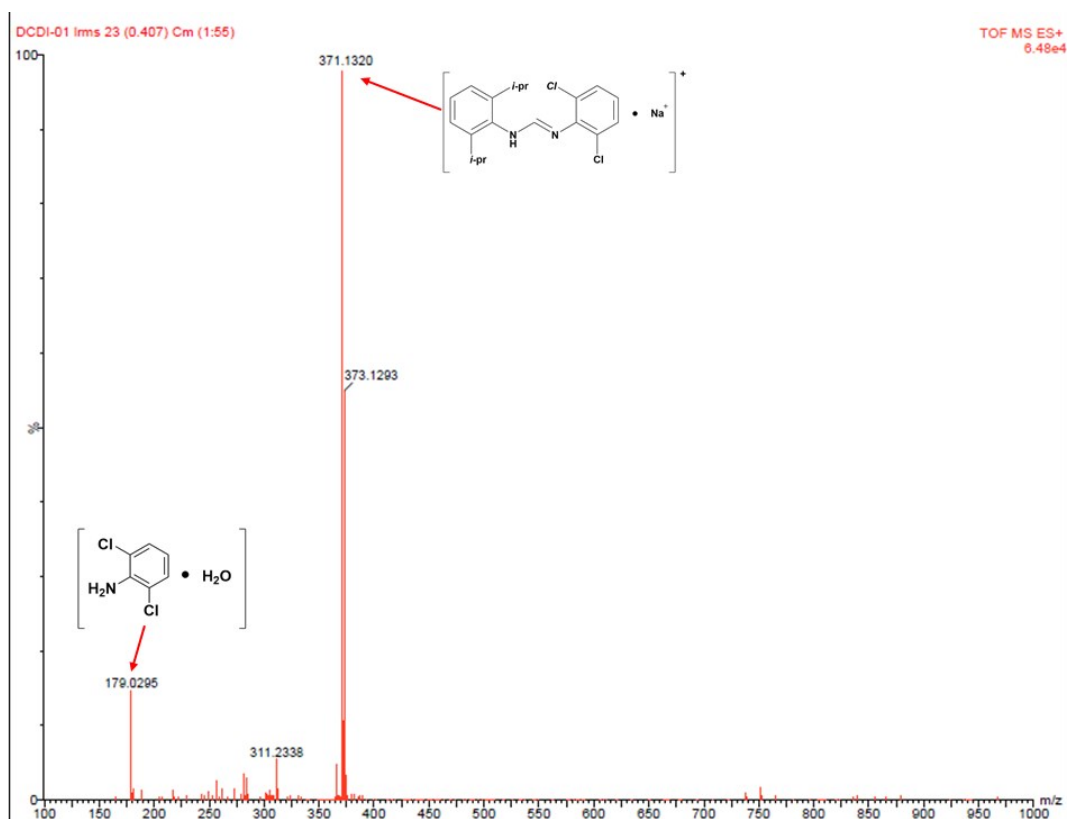

Figure S32: ESI-MS(+) spectrum of **6**

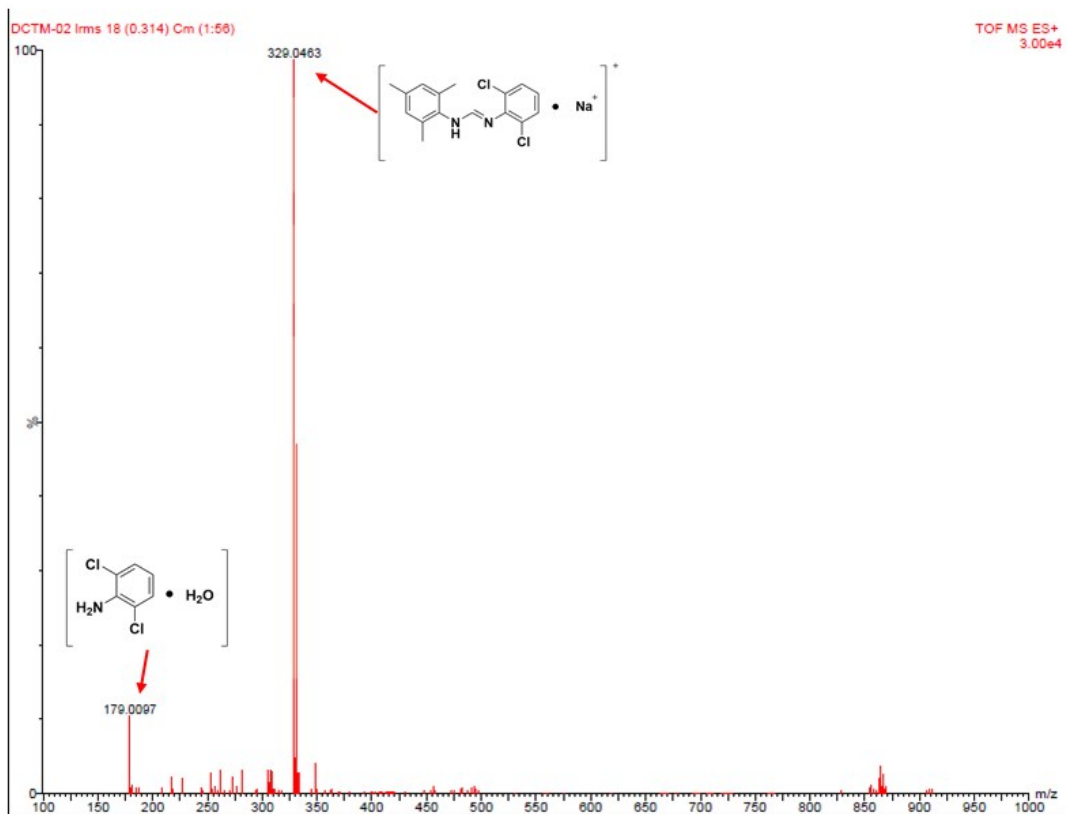

Figure S33: ESI-MS(+) spectrum of **7**

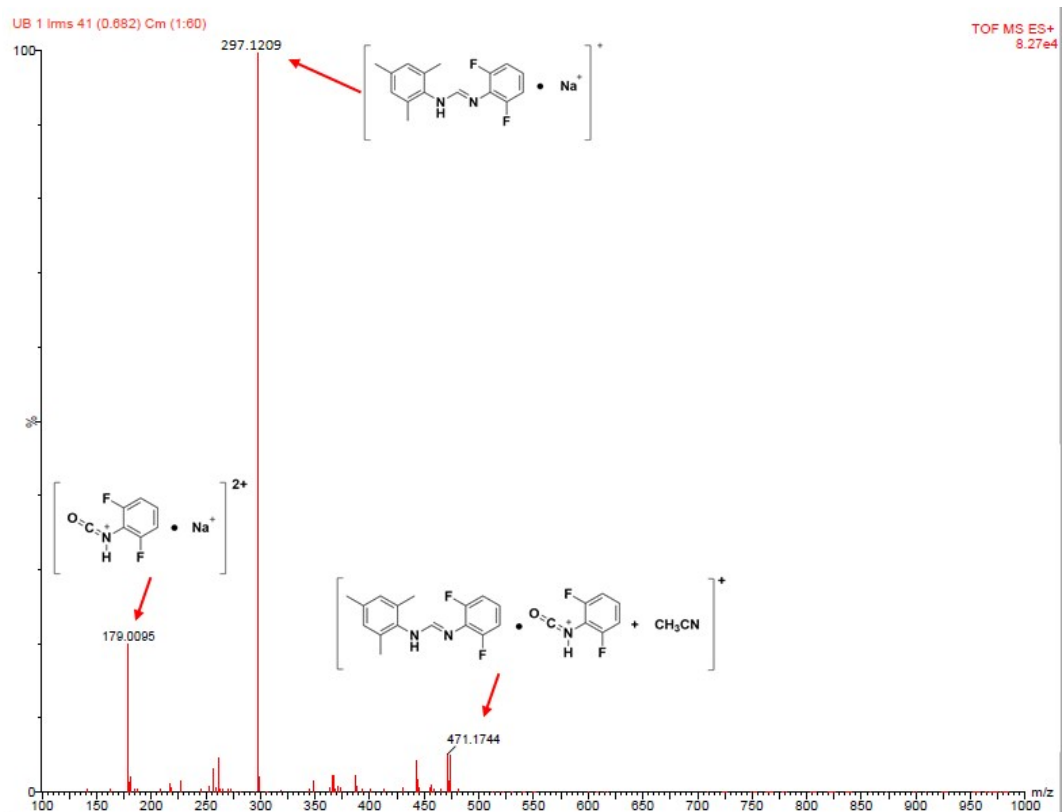

Figure S34: ESI-MS(+) spectrum of **8**

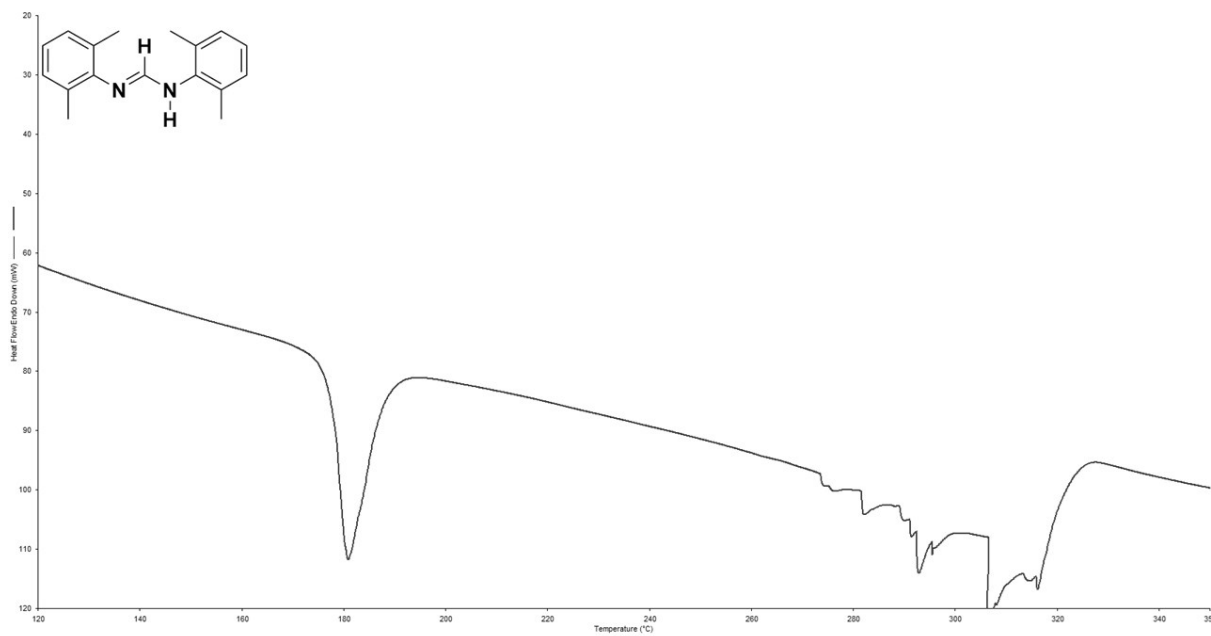

Figure S35: DSC curve of **1**

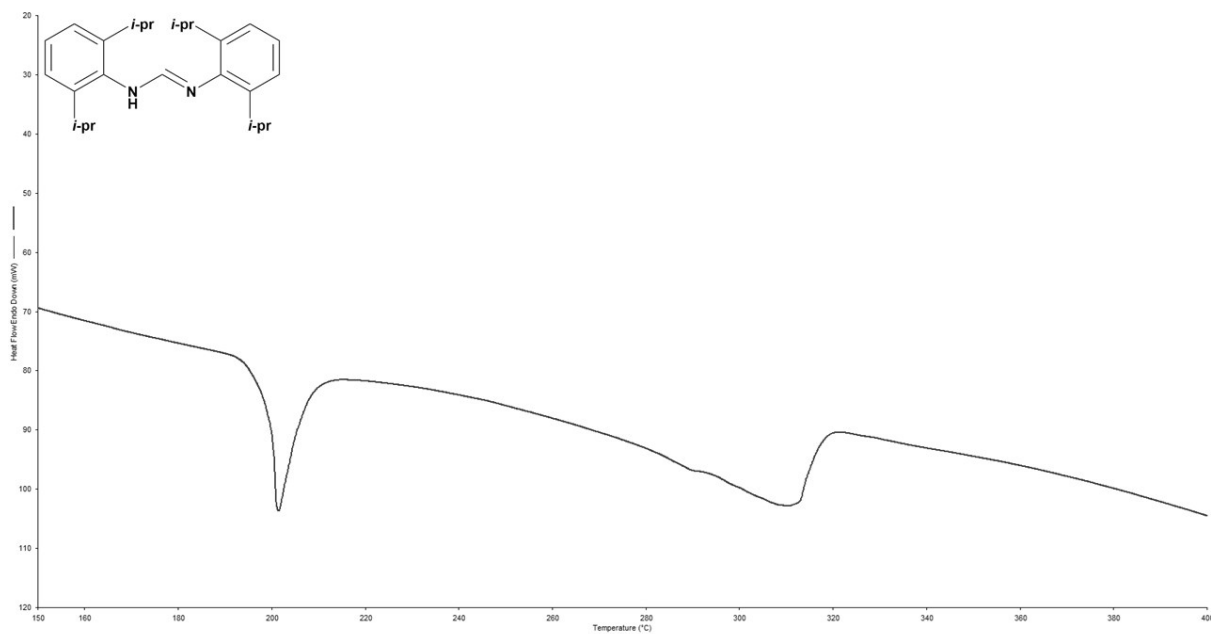

Figure S36: DSC curve of 2

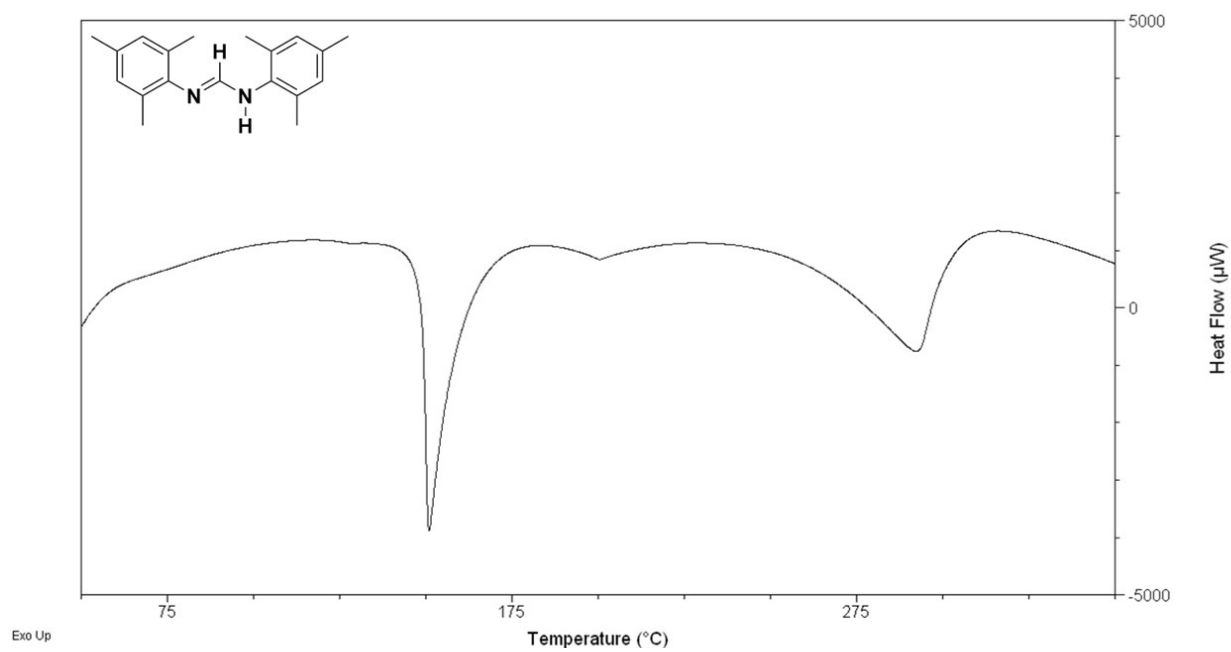

Figure S37: DSC curve of 3

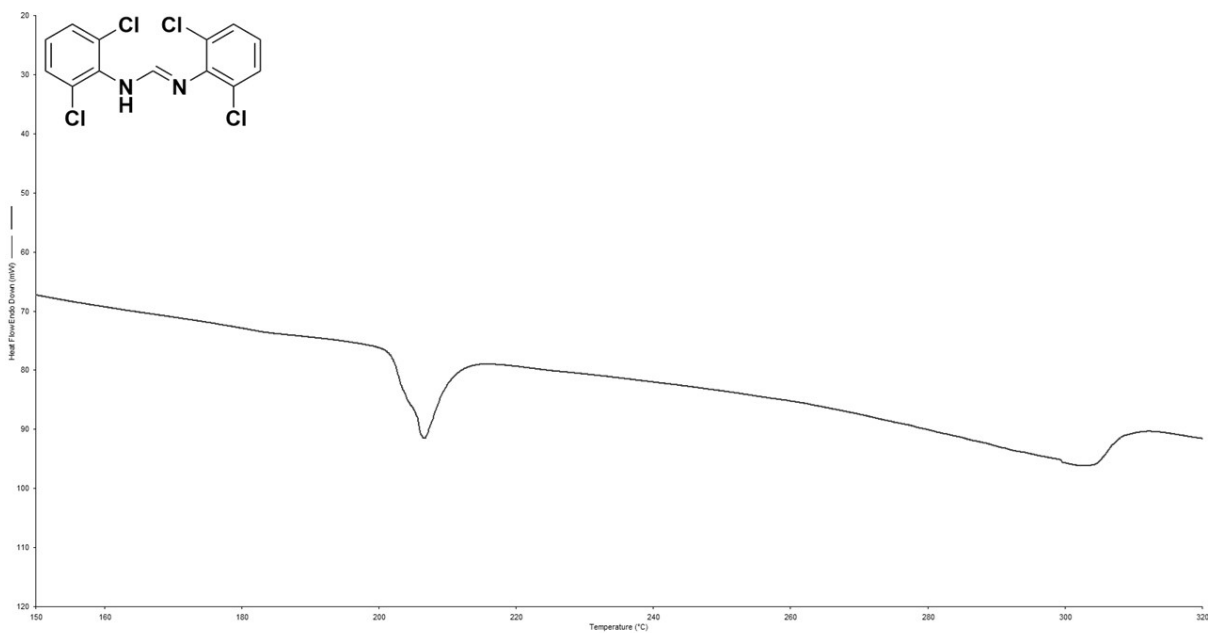

Figure S38: DSC curve of **4**

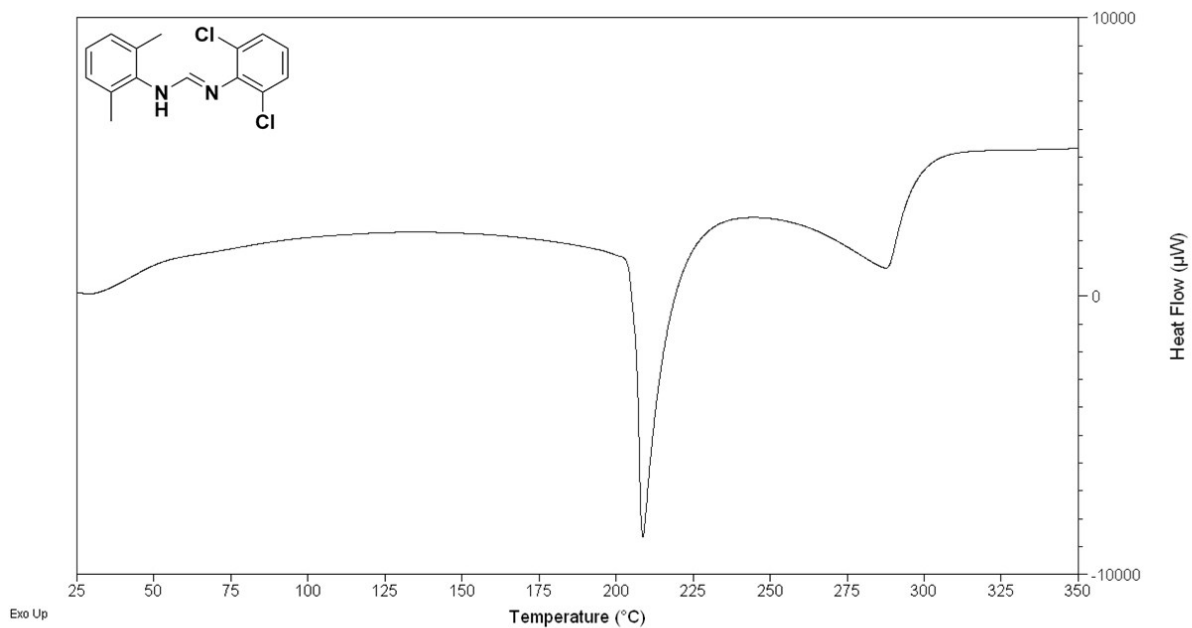

Figure S39: DSC curve of **5**

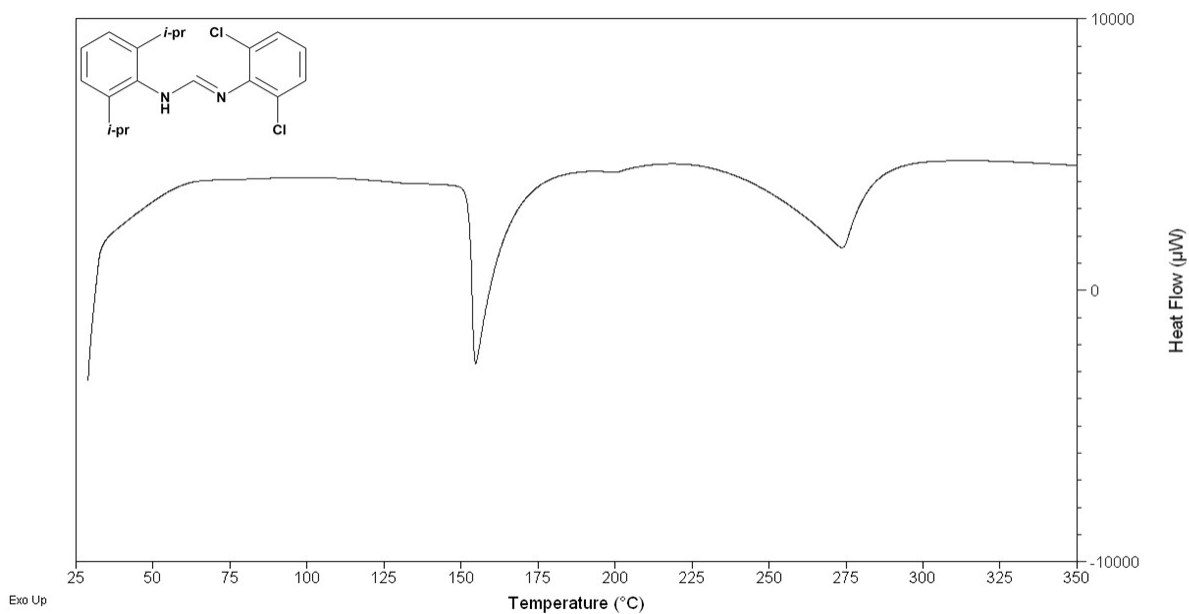

Figure S40: DSC curve of 6

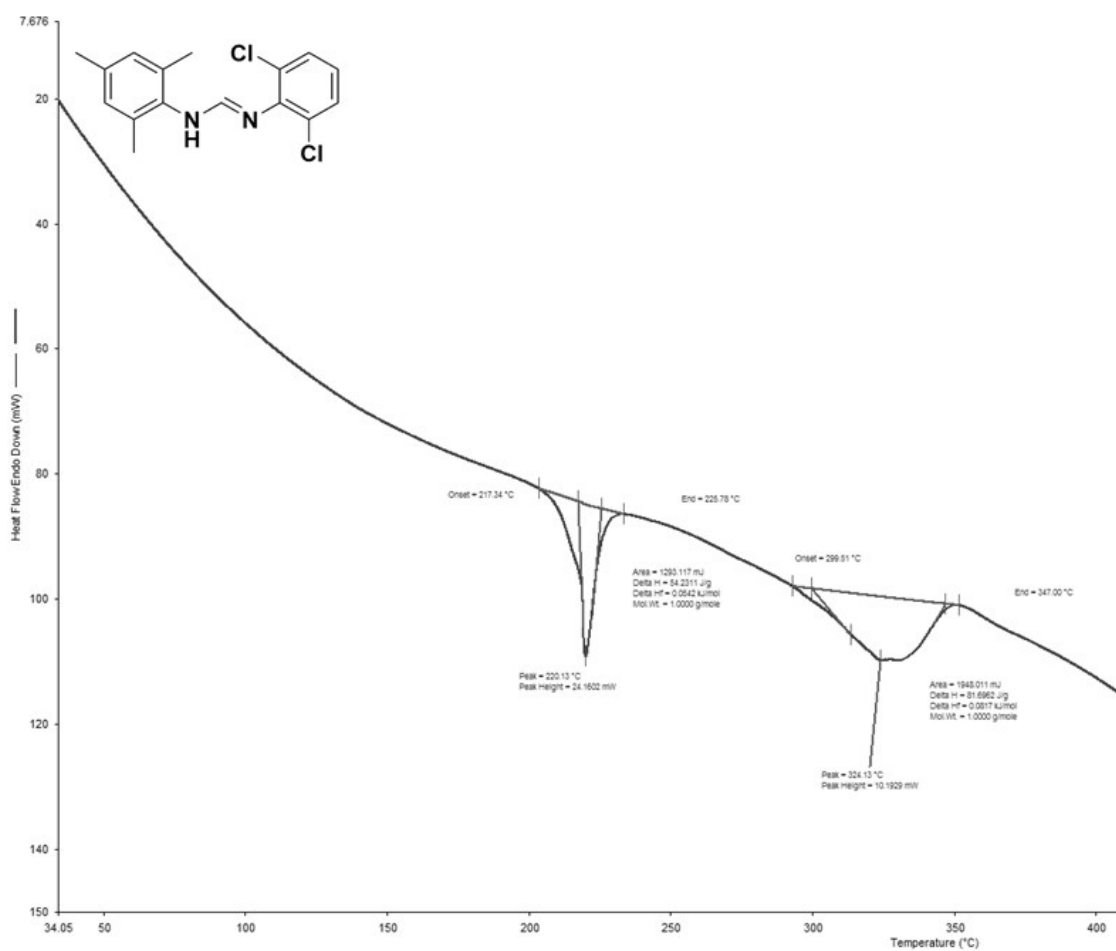

Figure S41: DSC curve of 7

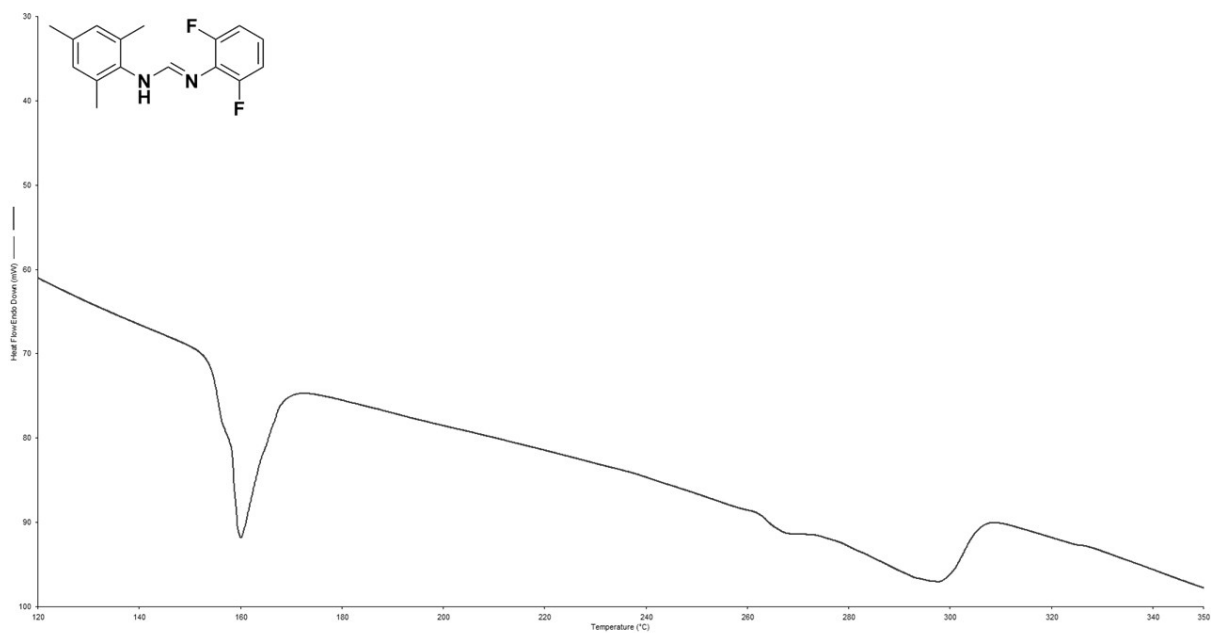

Figure S42: DSC curve of **8**
